# Supplementary material
Source: PubMed Central journal article supplement (PMC7173703)
Supplement: jo9b02426_si_001.pdf [file jo9b02426_si_001.pdf]

## Supporting Information

# Thienopyrrolo[3,2,1-*jk*]carbazoles: Building Blocks for Functional Organic Materials.

Dorian Bader, Johannes Fröhlich, Paul Kautny\*

Institute of Applied Synthetic Chemistry, TU Wien, Getreidemarkt 9/163, A-1060 Vienna, Austria

[\\*paul.kautny@tuwien.ac.at](mailto:*paul.kautny@tuwien.ac.at)

## Table of Contents

|                                                                       |    |
|-----------------------------------------------------------------------|----|
| 1. $^1\text{H}$ and $^{13}\text{C}$ NMR Spectra of the Products ..... | 1  |
| 2. Cyclic Voltammetry .....                                           | 16 |
| 3. HRMS – Spectra .....                                               | 20 |
| 4. Electrochemical and photophysical data .....                       | 27 |

### 1. $^1\text{H}$ and $^{13}\text{C}$ NMR Spectra of the Products

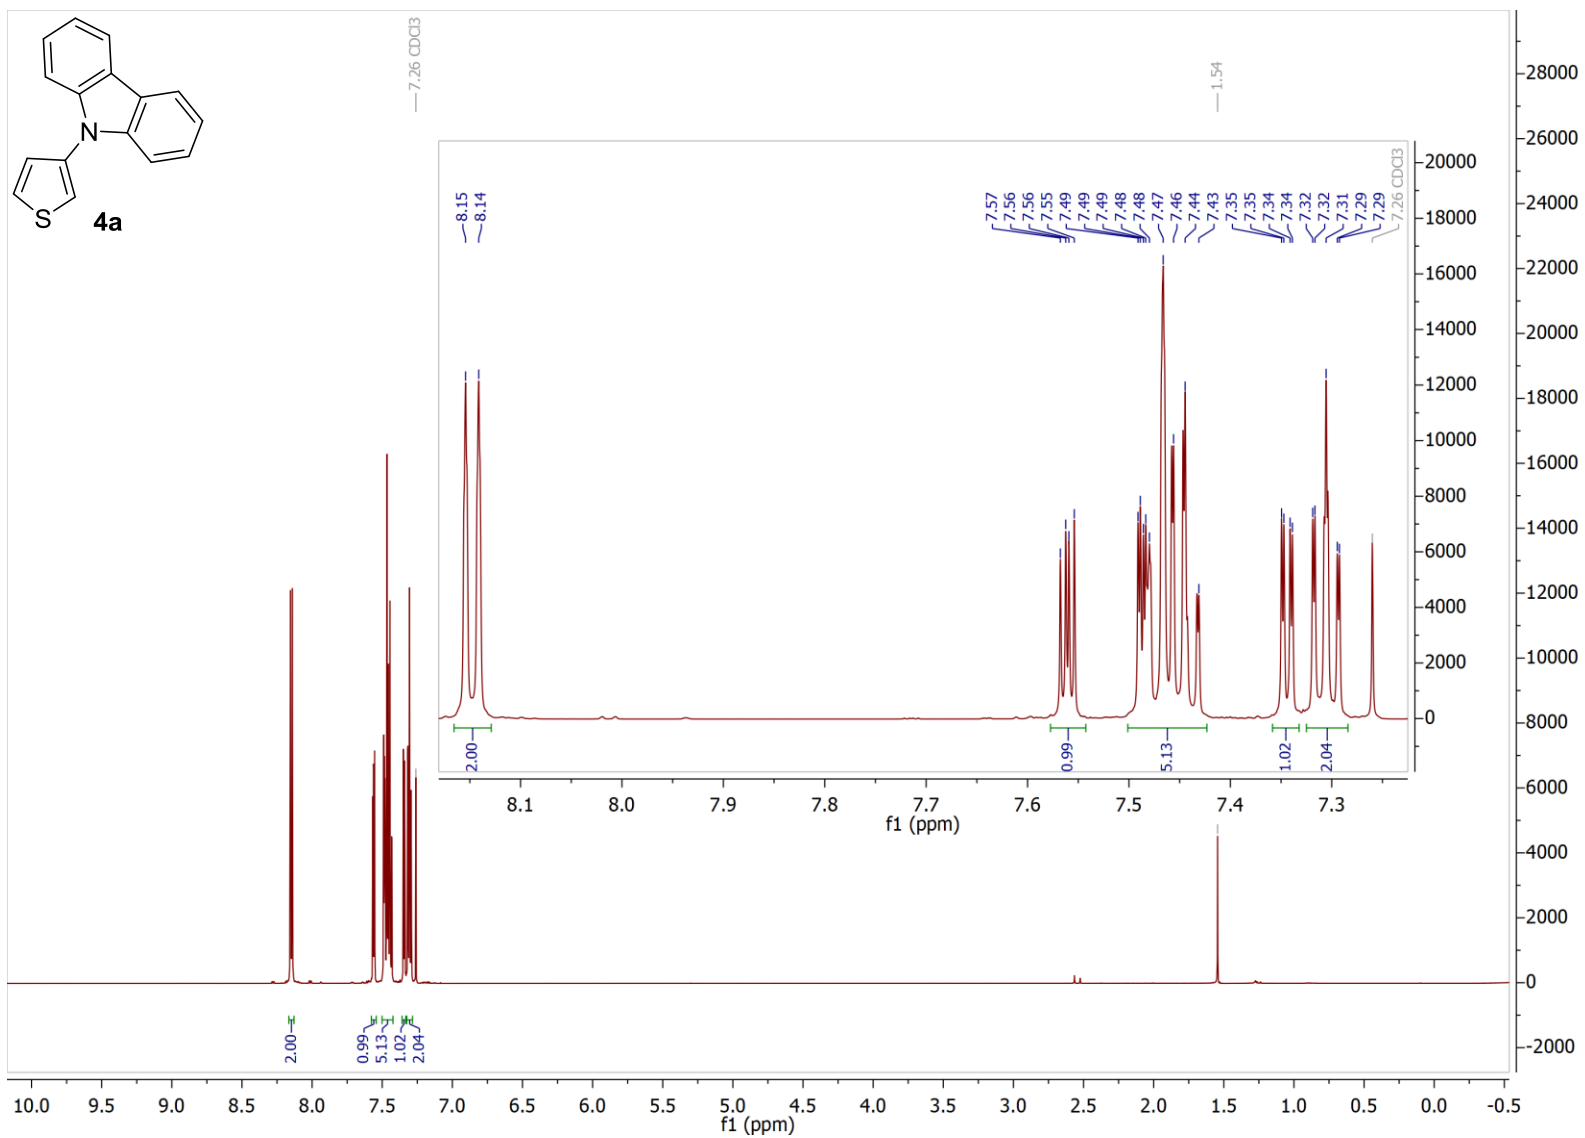

Figure S 1: <sup>1</sup>H NMR spectrum of 4a

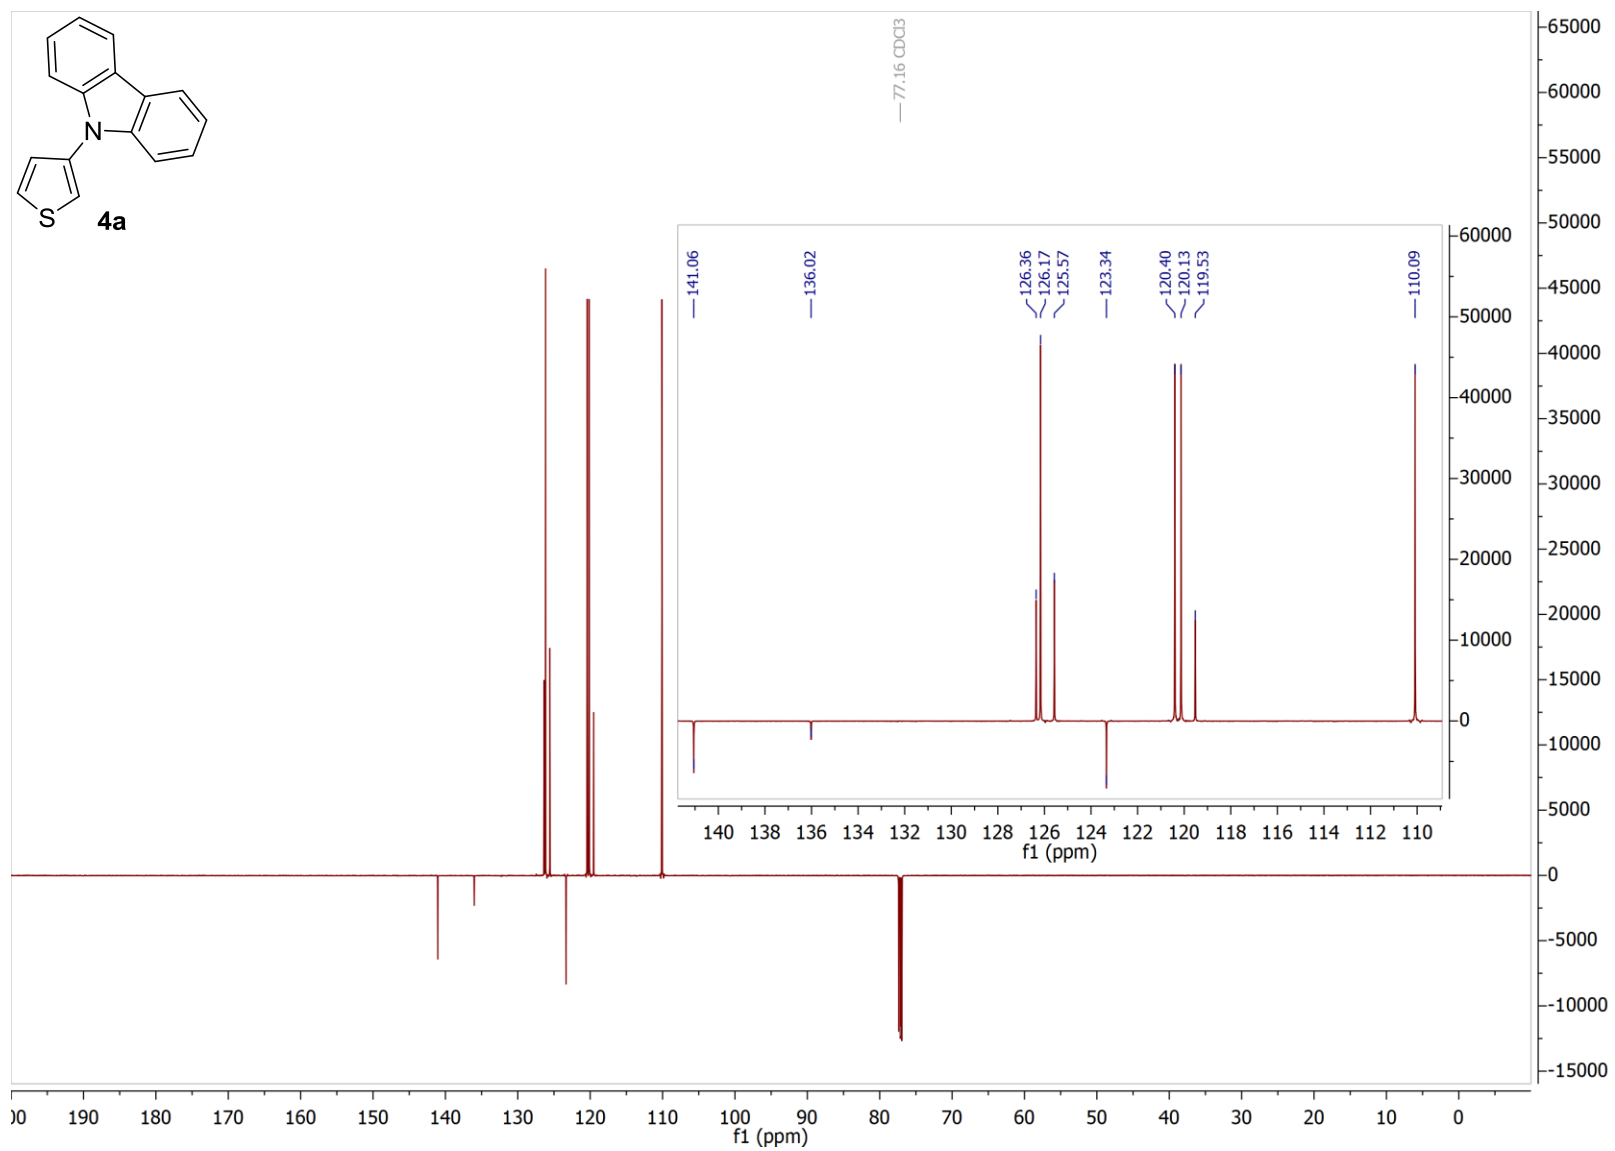

Figure S 2:  $^{13}\text{C}$  NMR spectrum of **4a**

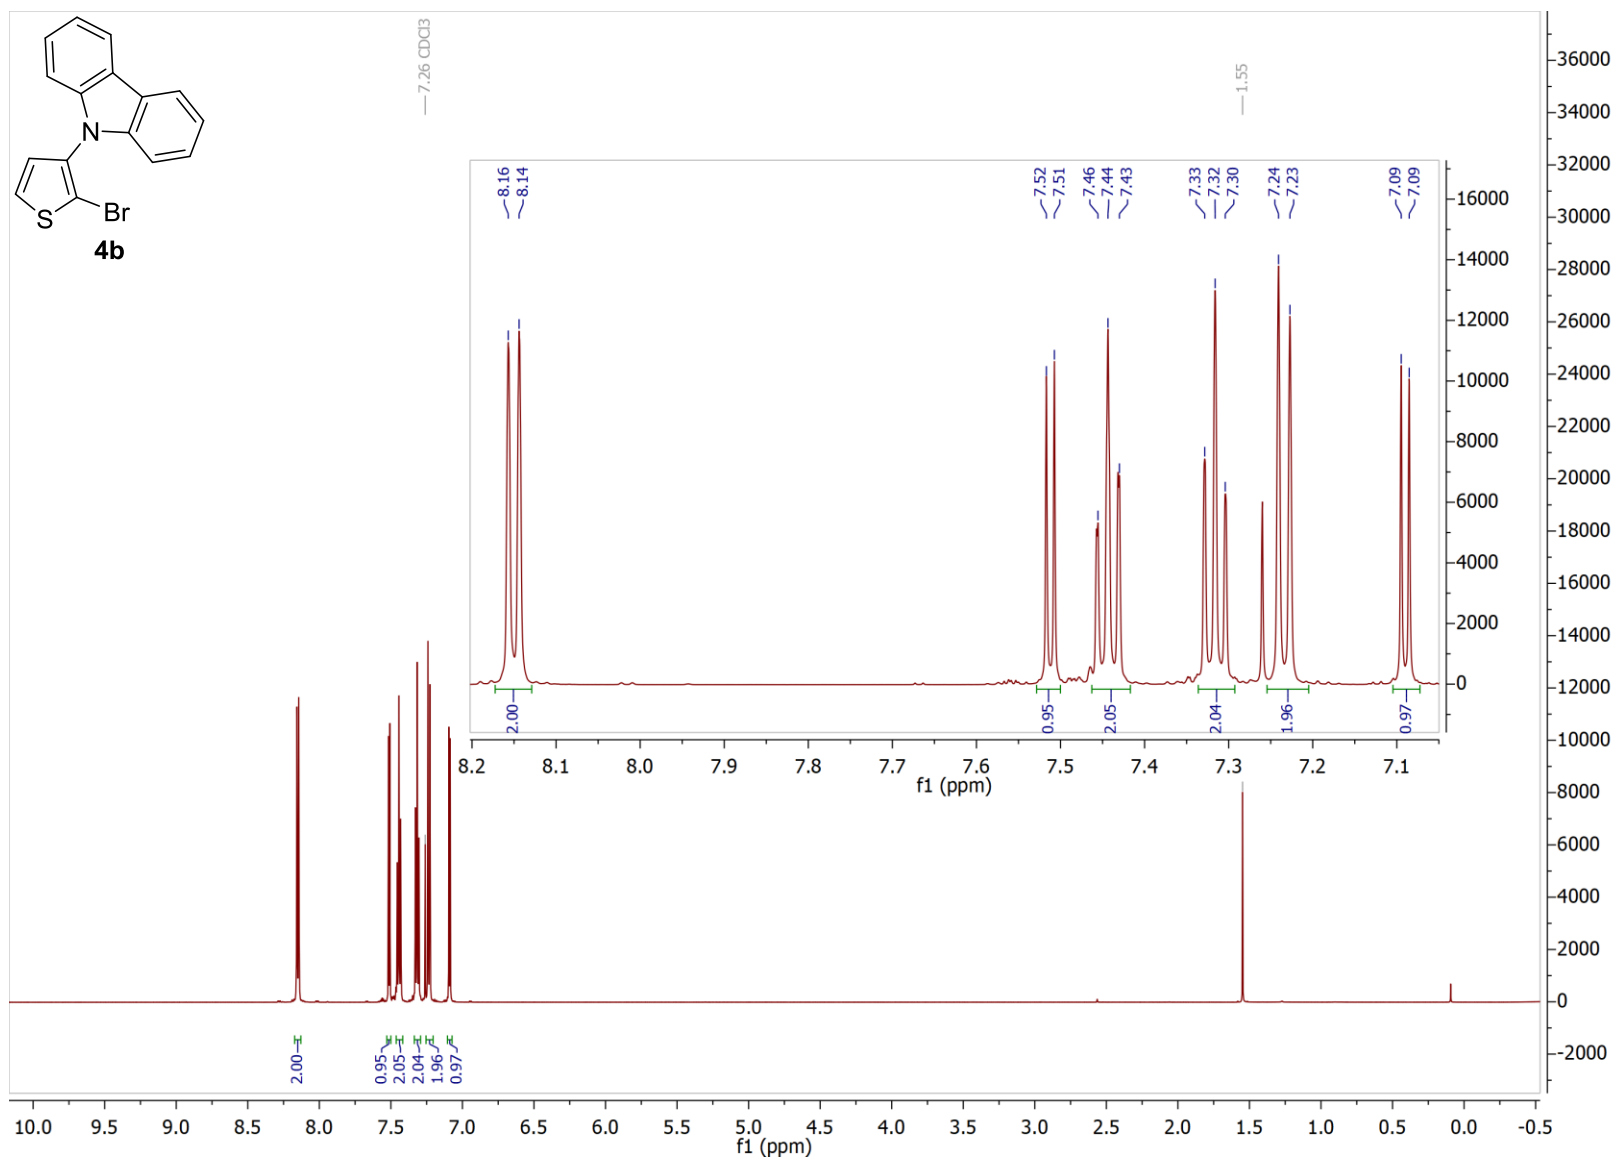

Figure S 3: <sup>1</sup>H NMR spectrum of **4b**

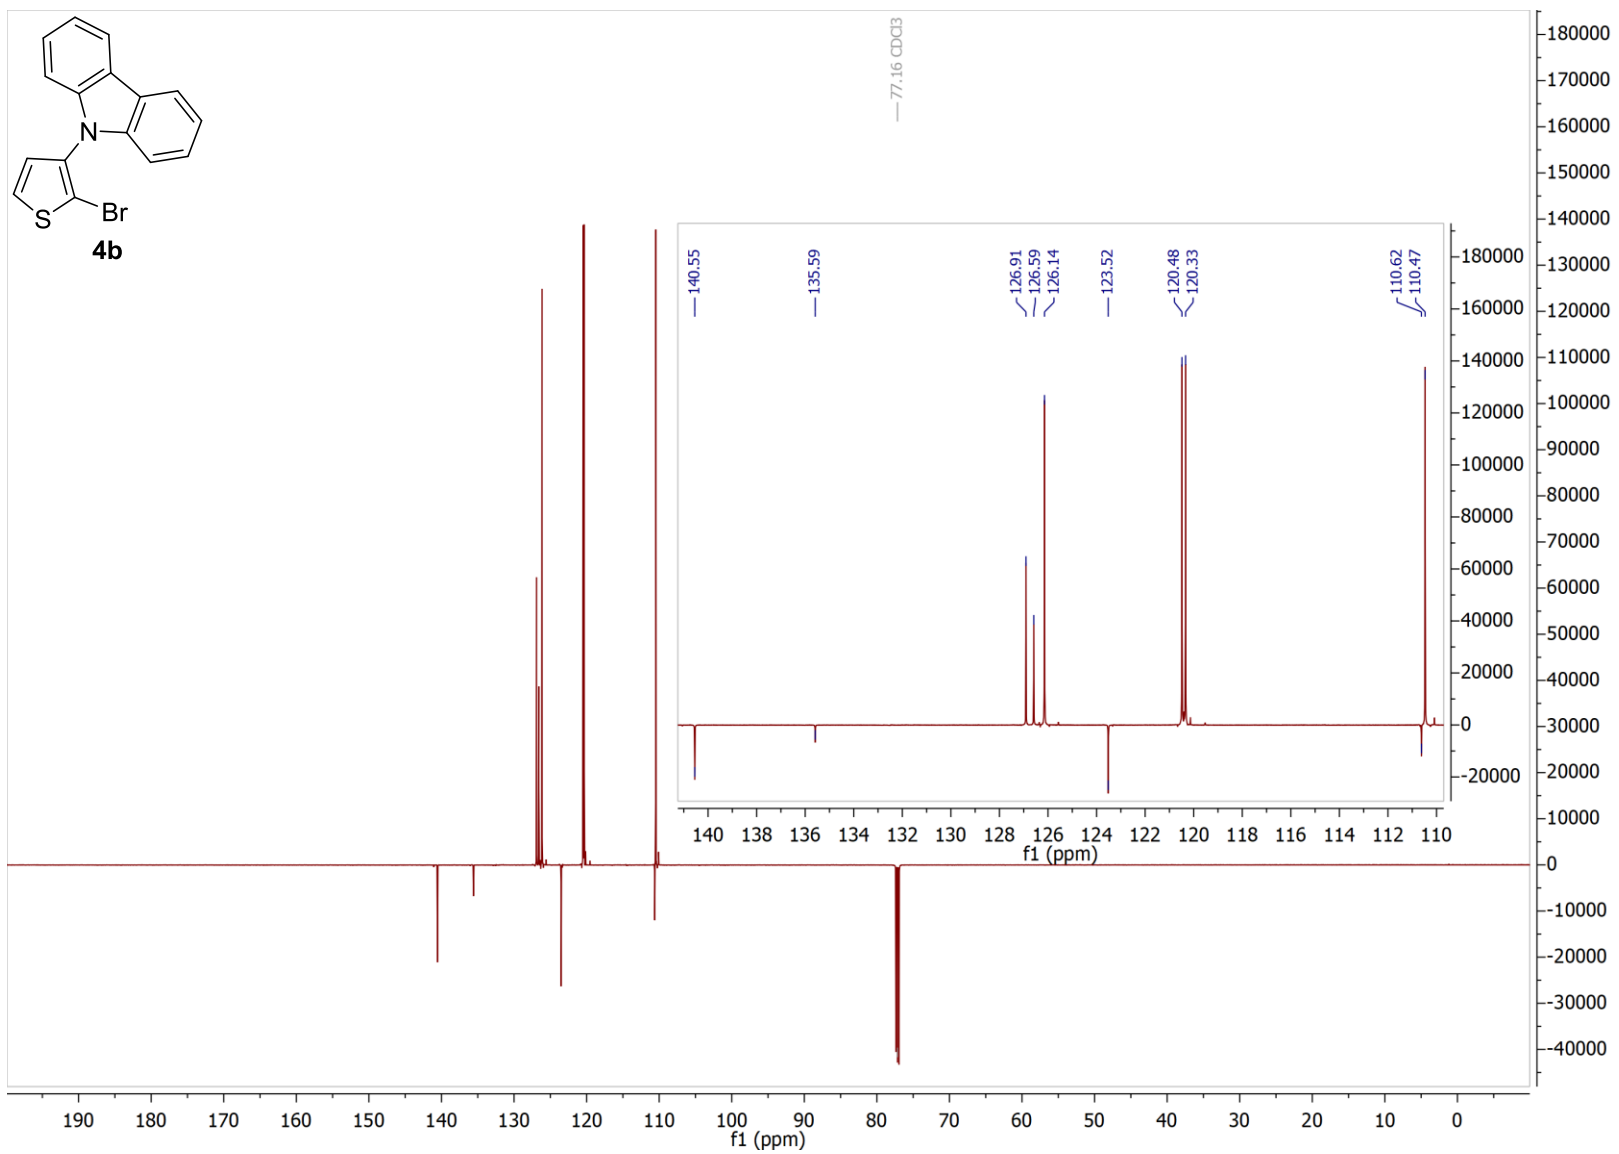

Figure S 4:  $^{13}\text{C}$  NMR spectrum of **4b**

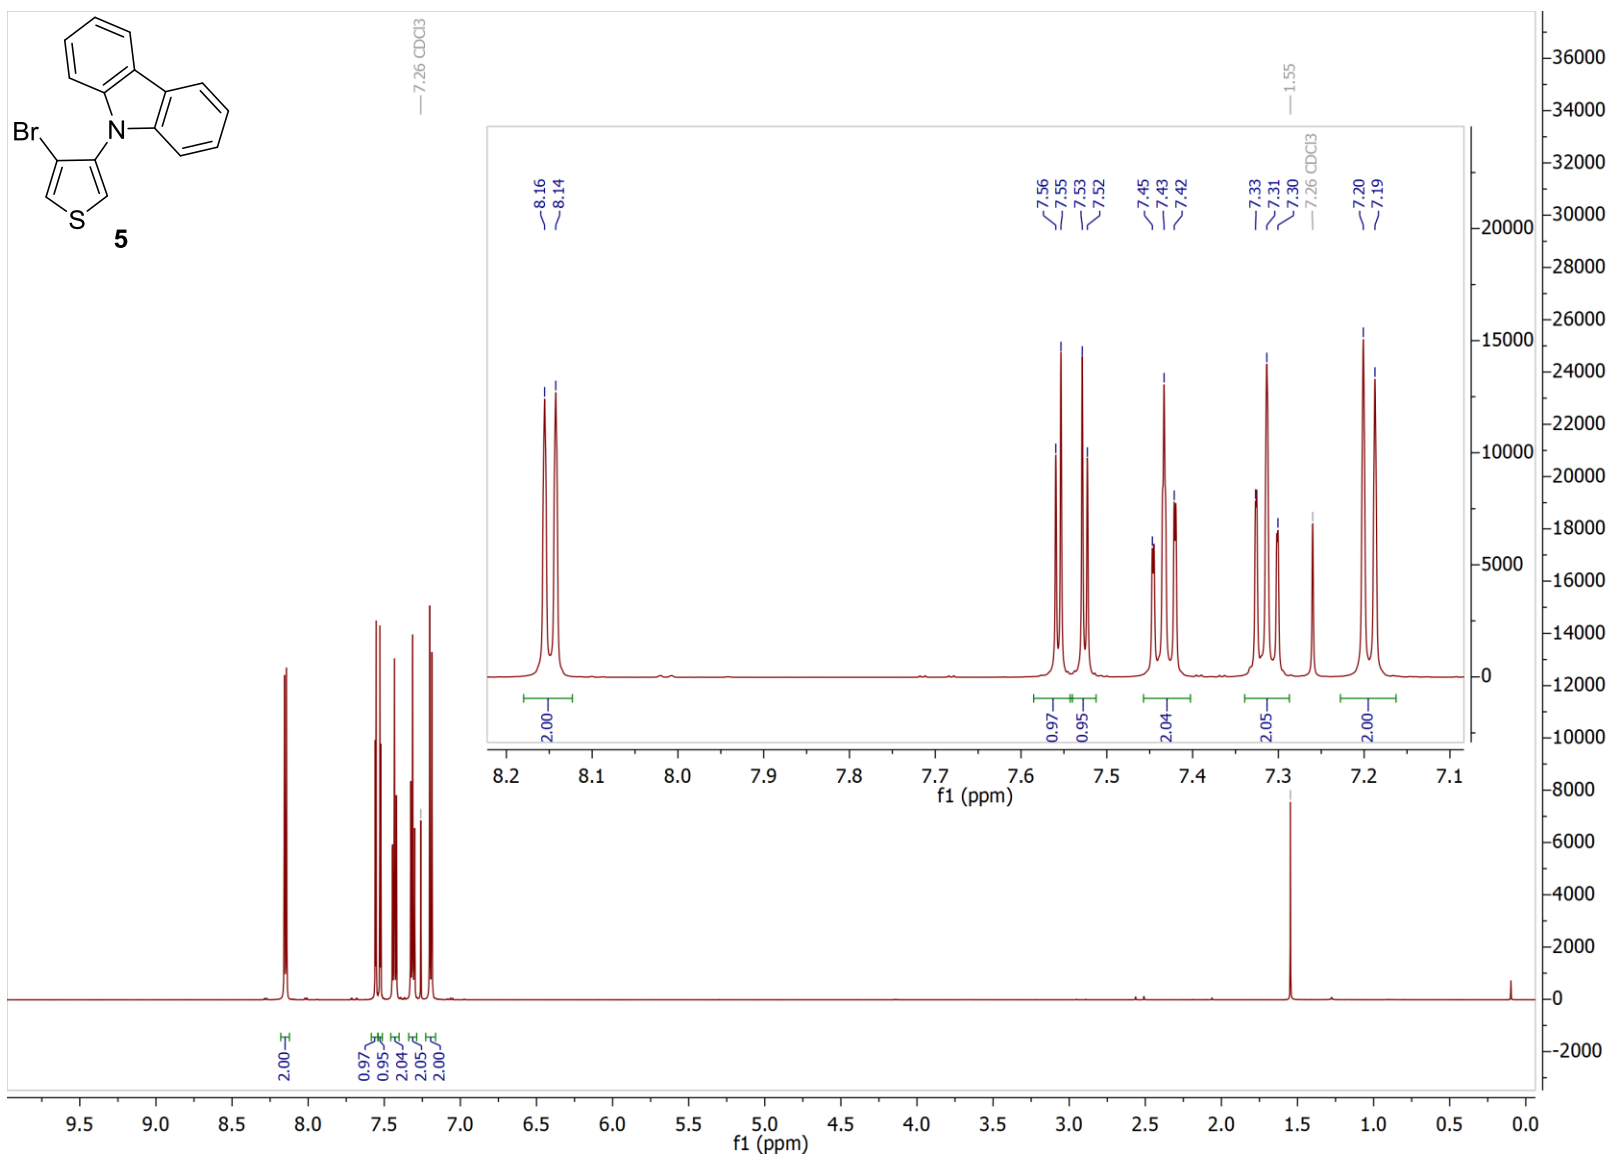

**Figure S 5:** <sup>1</sup>H NMR spectrum of **5**

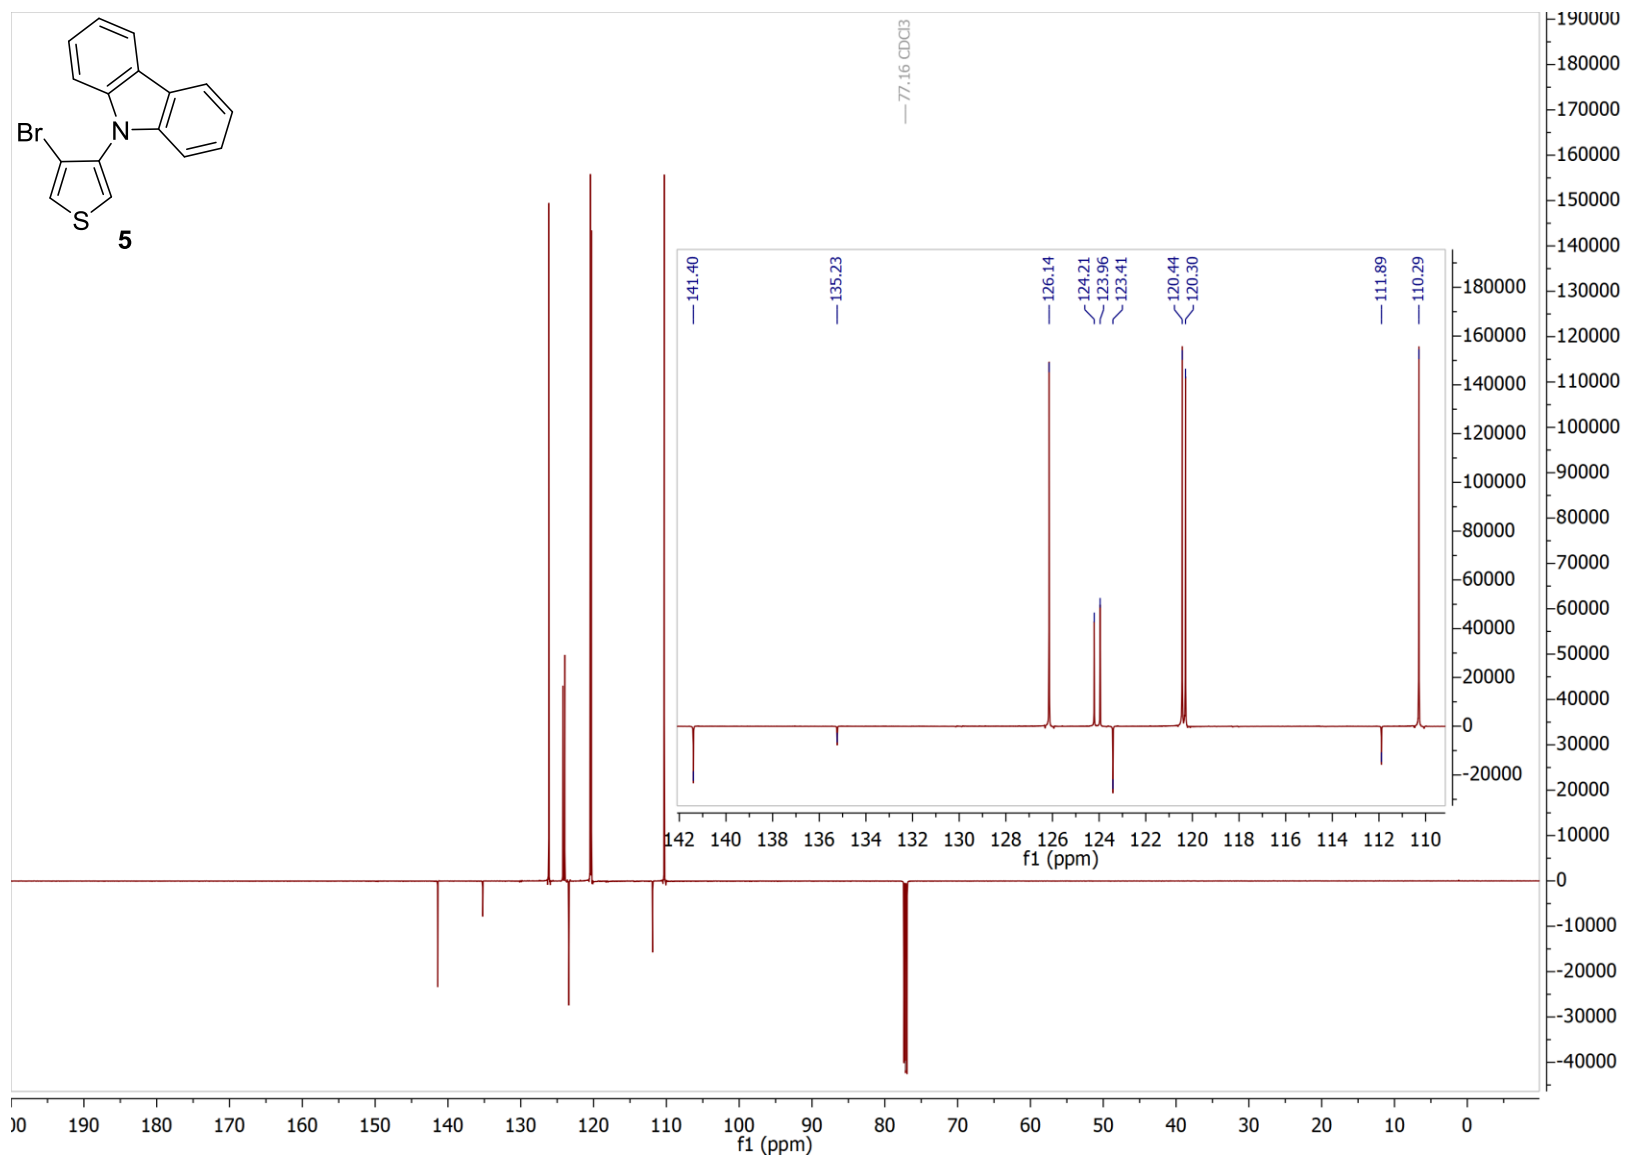

Figure S 6:  $^{13}\text{C}$  NMR spectrum of **5**

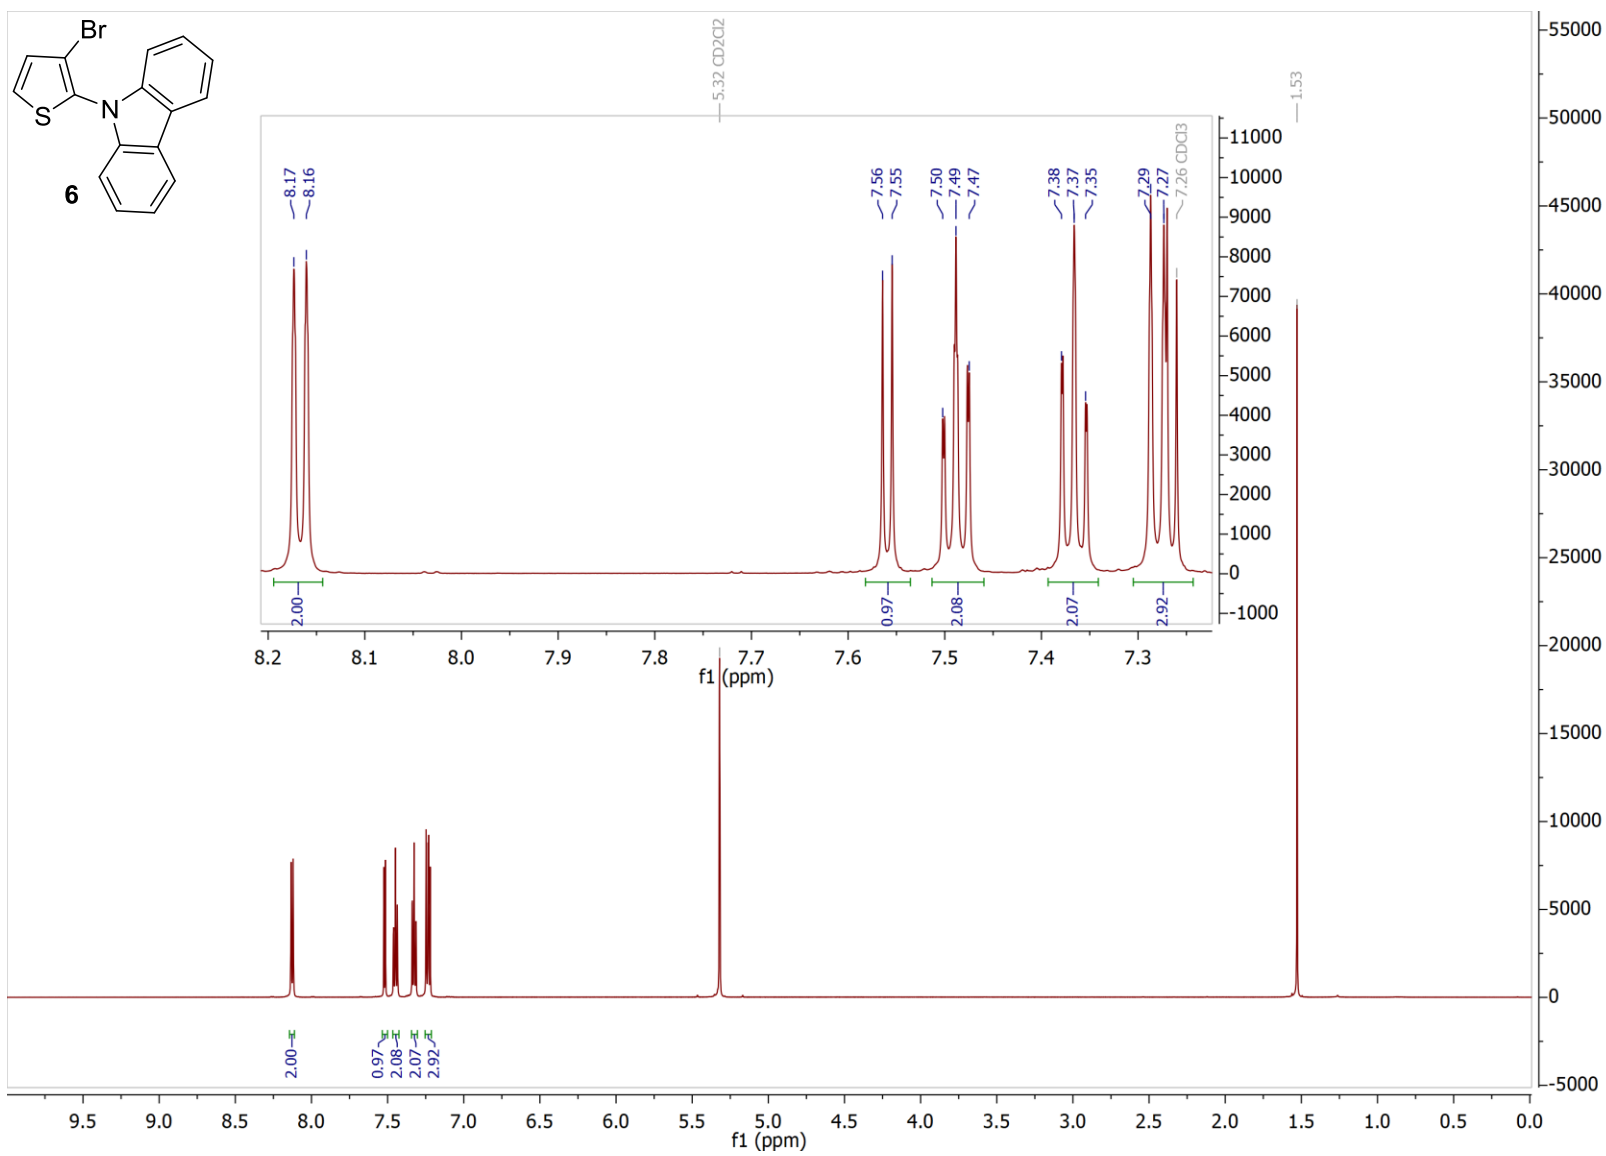

Figure S 7:  $^1\text{H}$  NMR spectrum of **6**



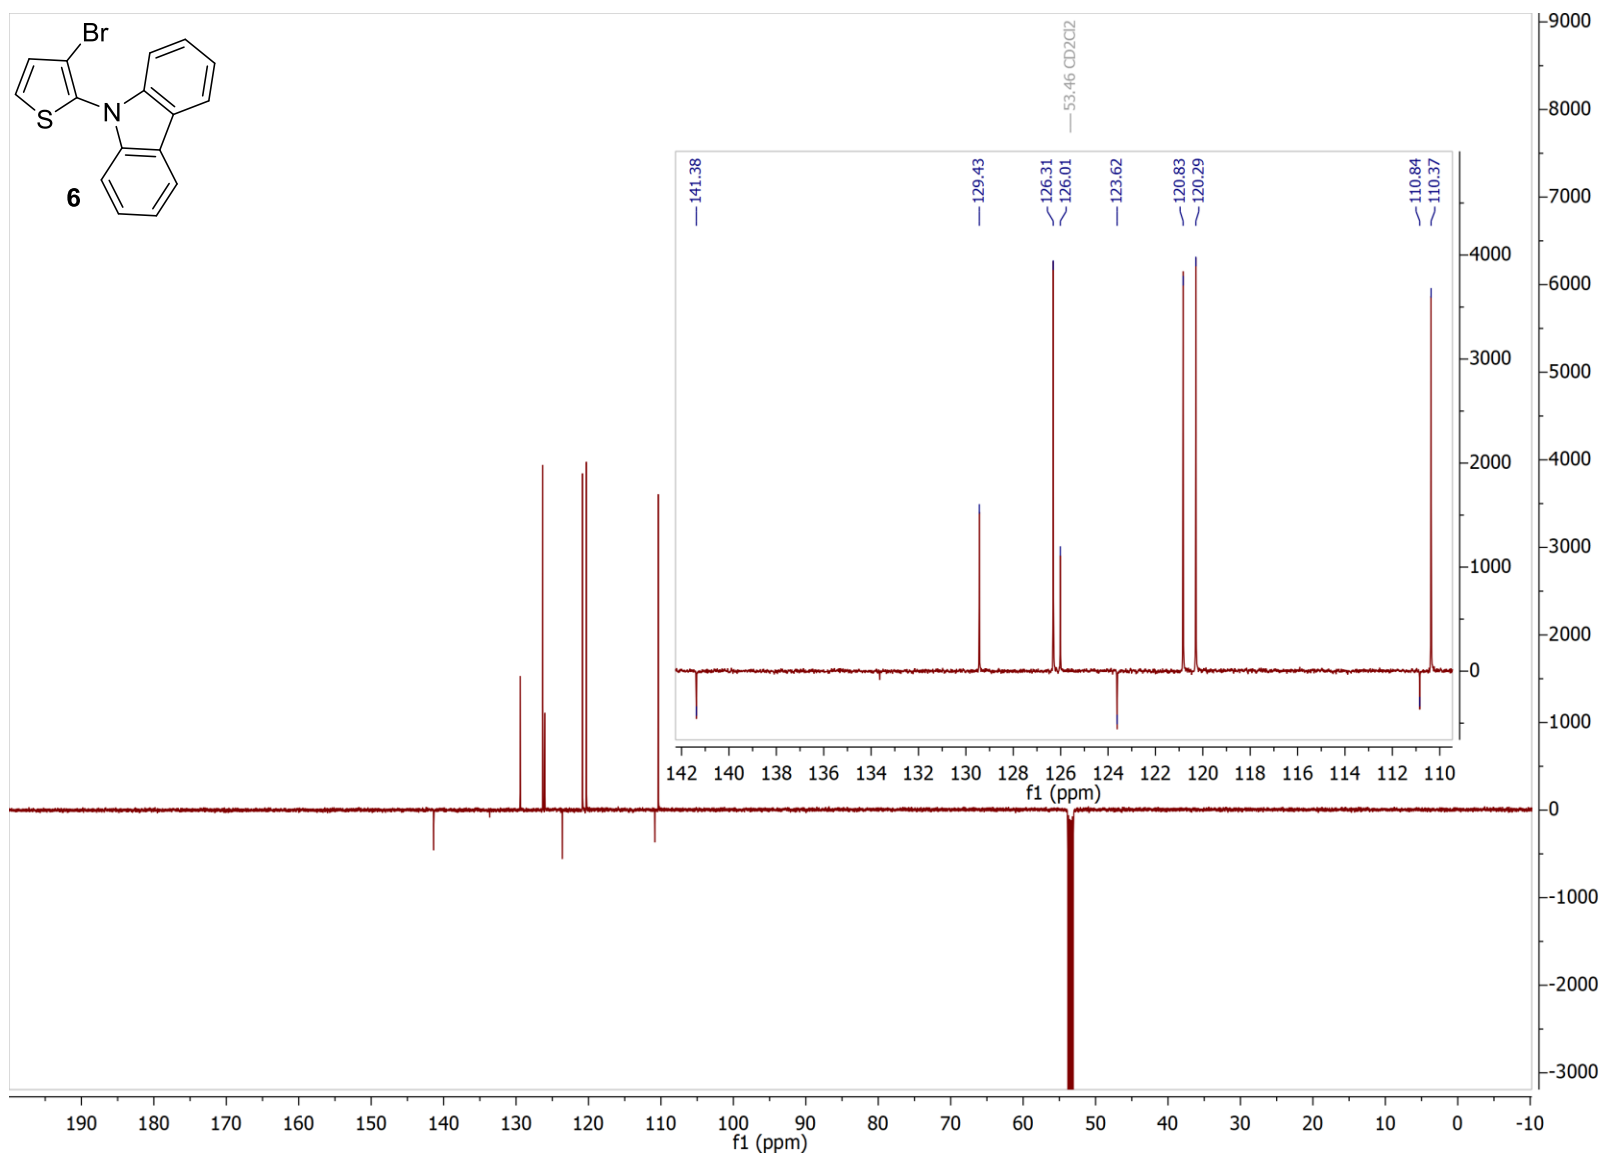

Figure S 8:  $^{13}\text{C}$  NMR spectrum of **6**

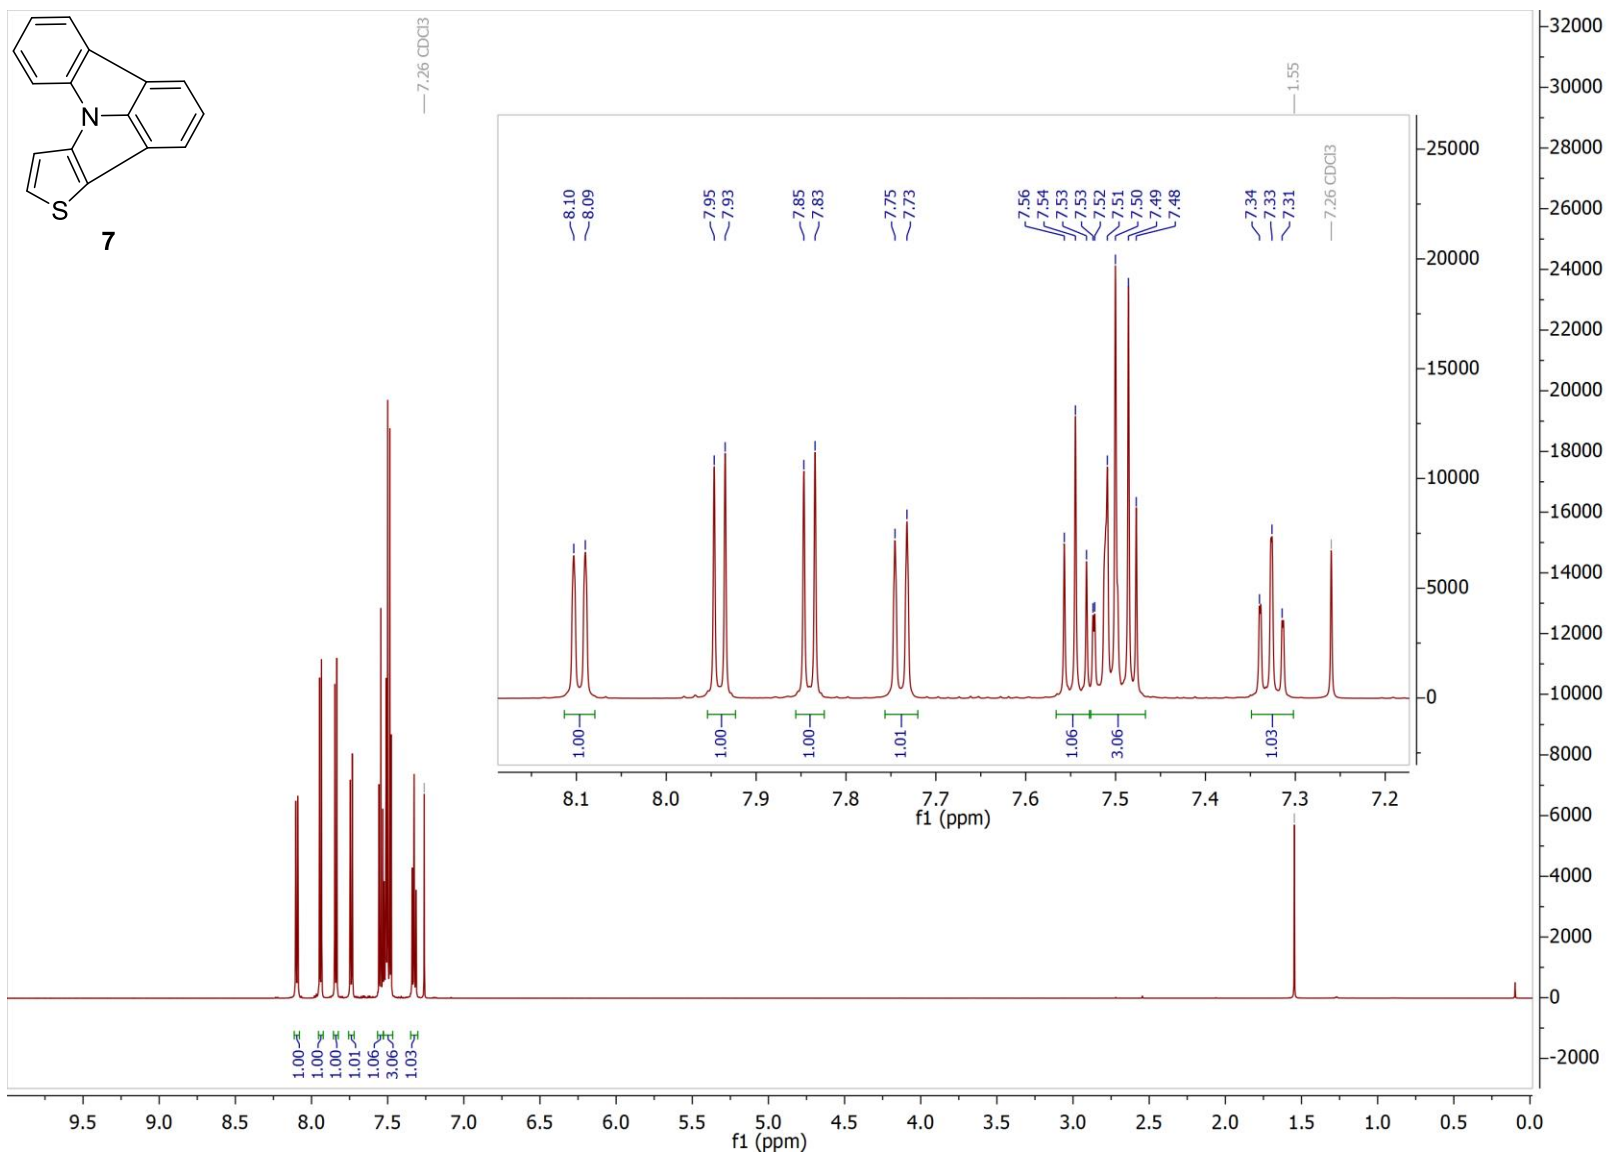

**Figure S 9:** <sup>1</sup>H NMR spectrum of **7**

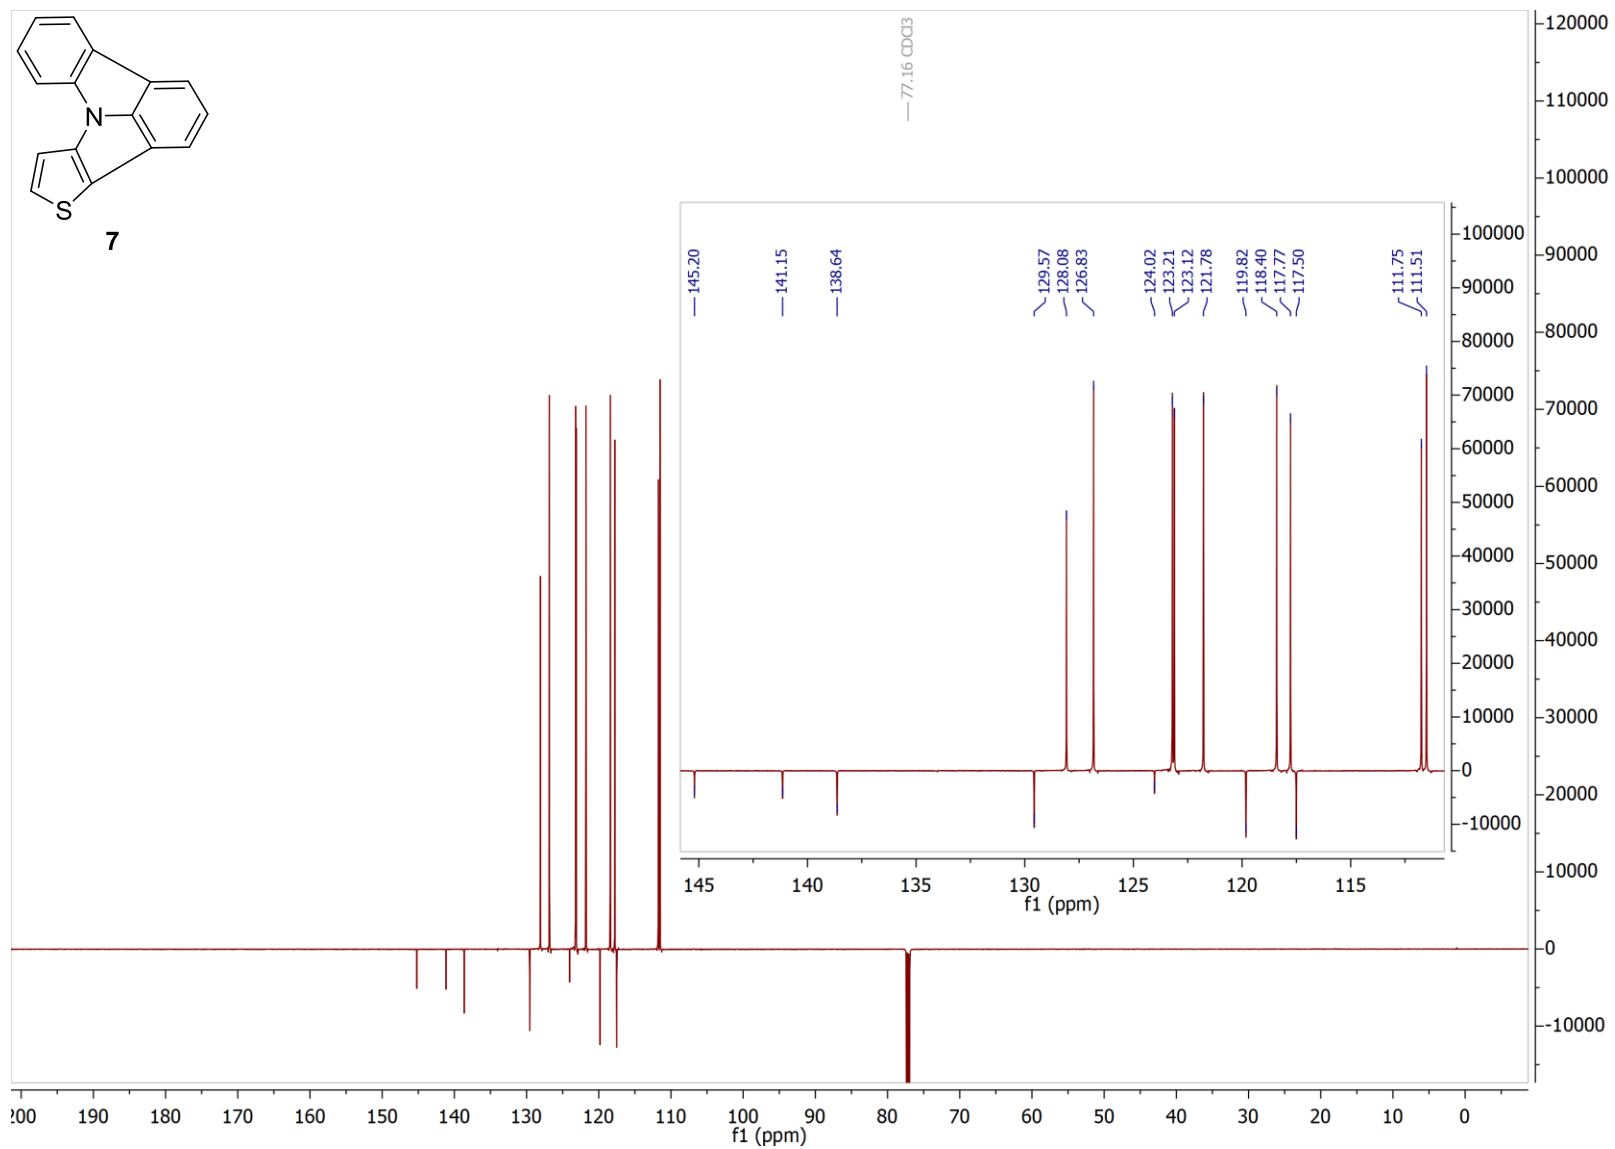

Figure S 10:  $^{13}\text{C}$  NMR spectrum of 7

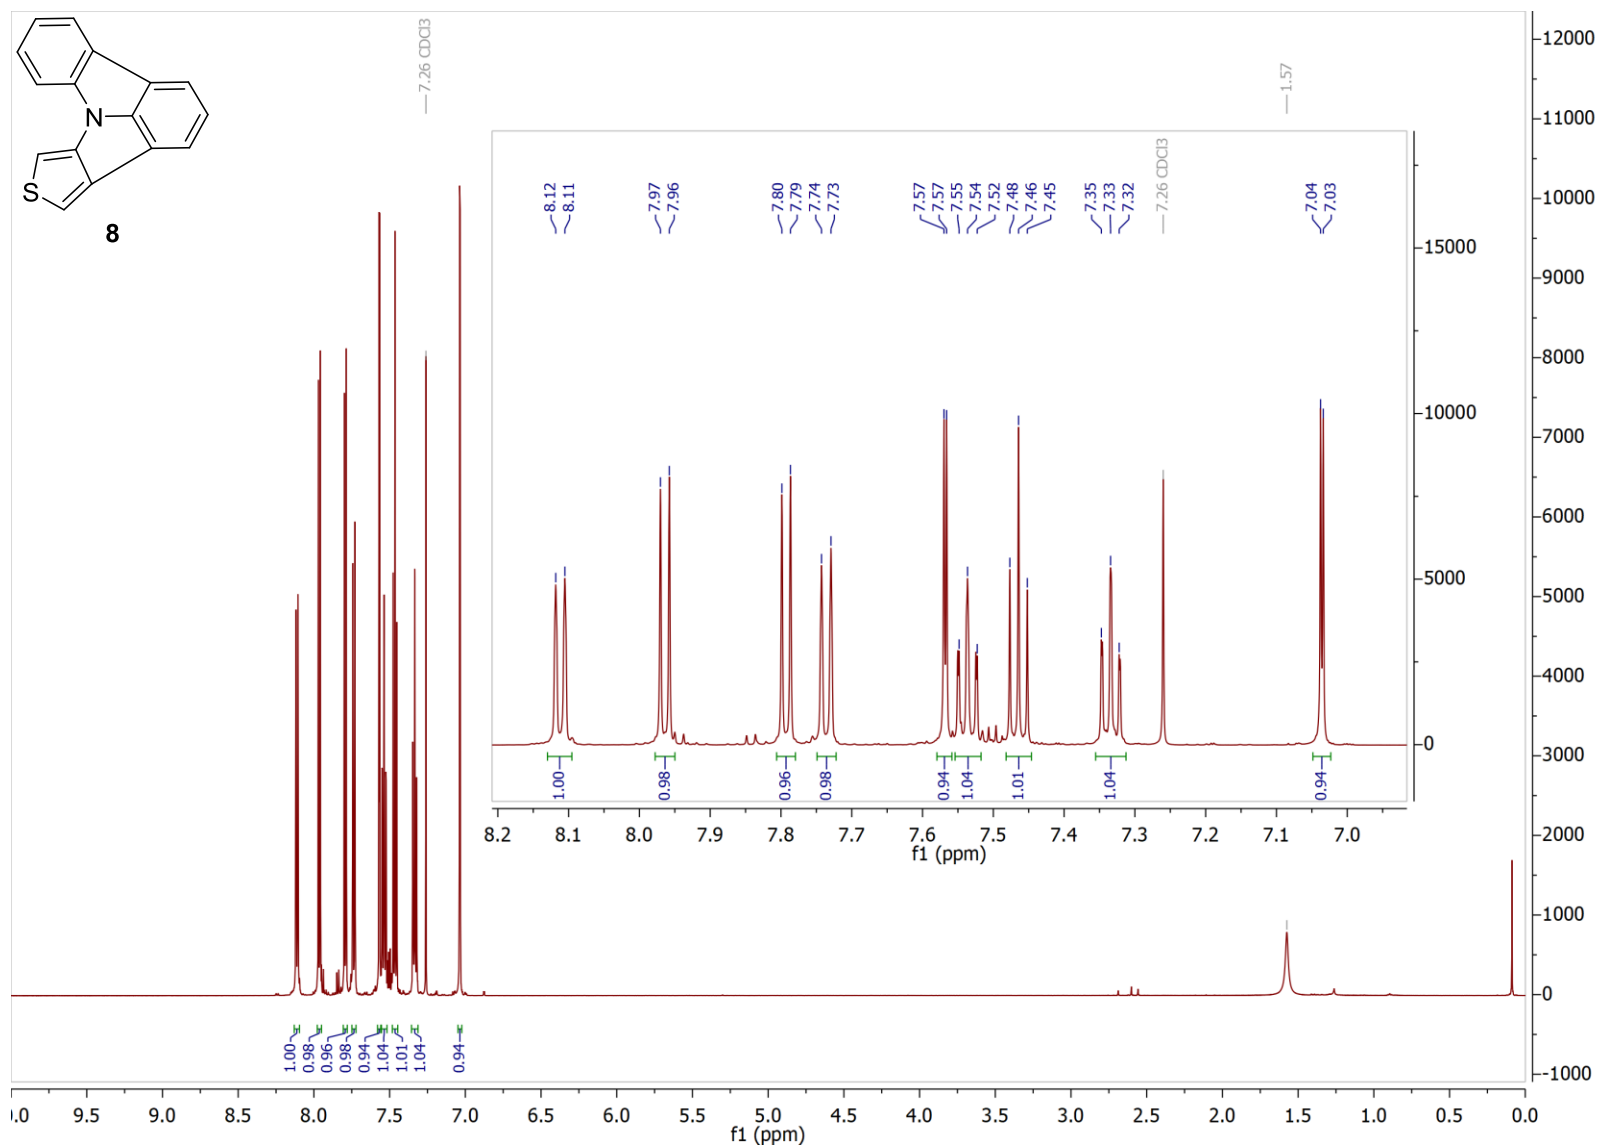

Figure S 11: <sup>1</sup>H NMR spectrum of 8

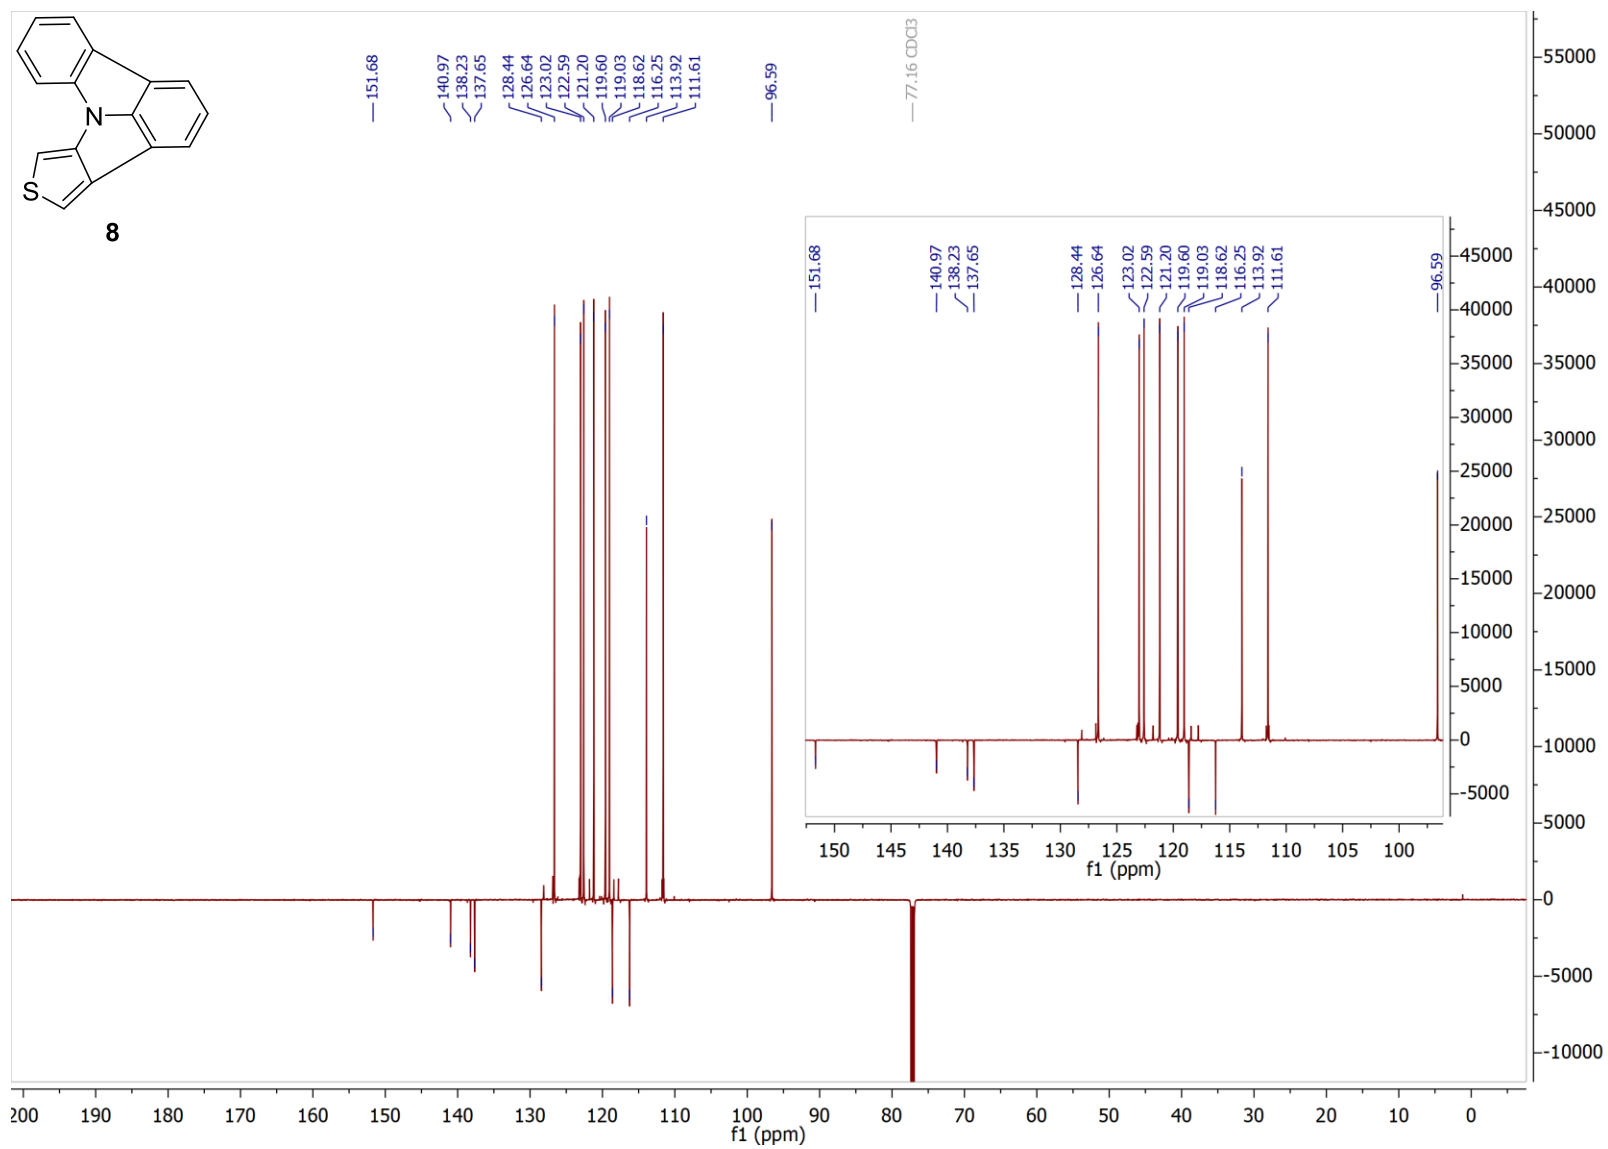

Figure S 12:  $^{13}\text{C}$  NMR spectrum of **8**

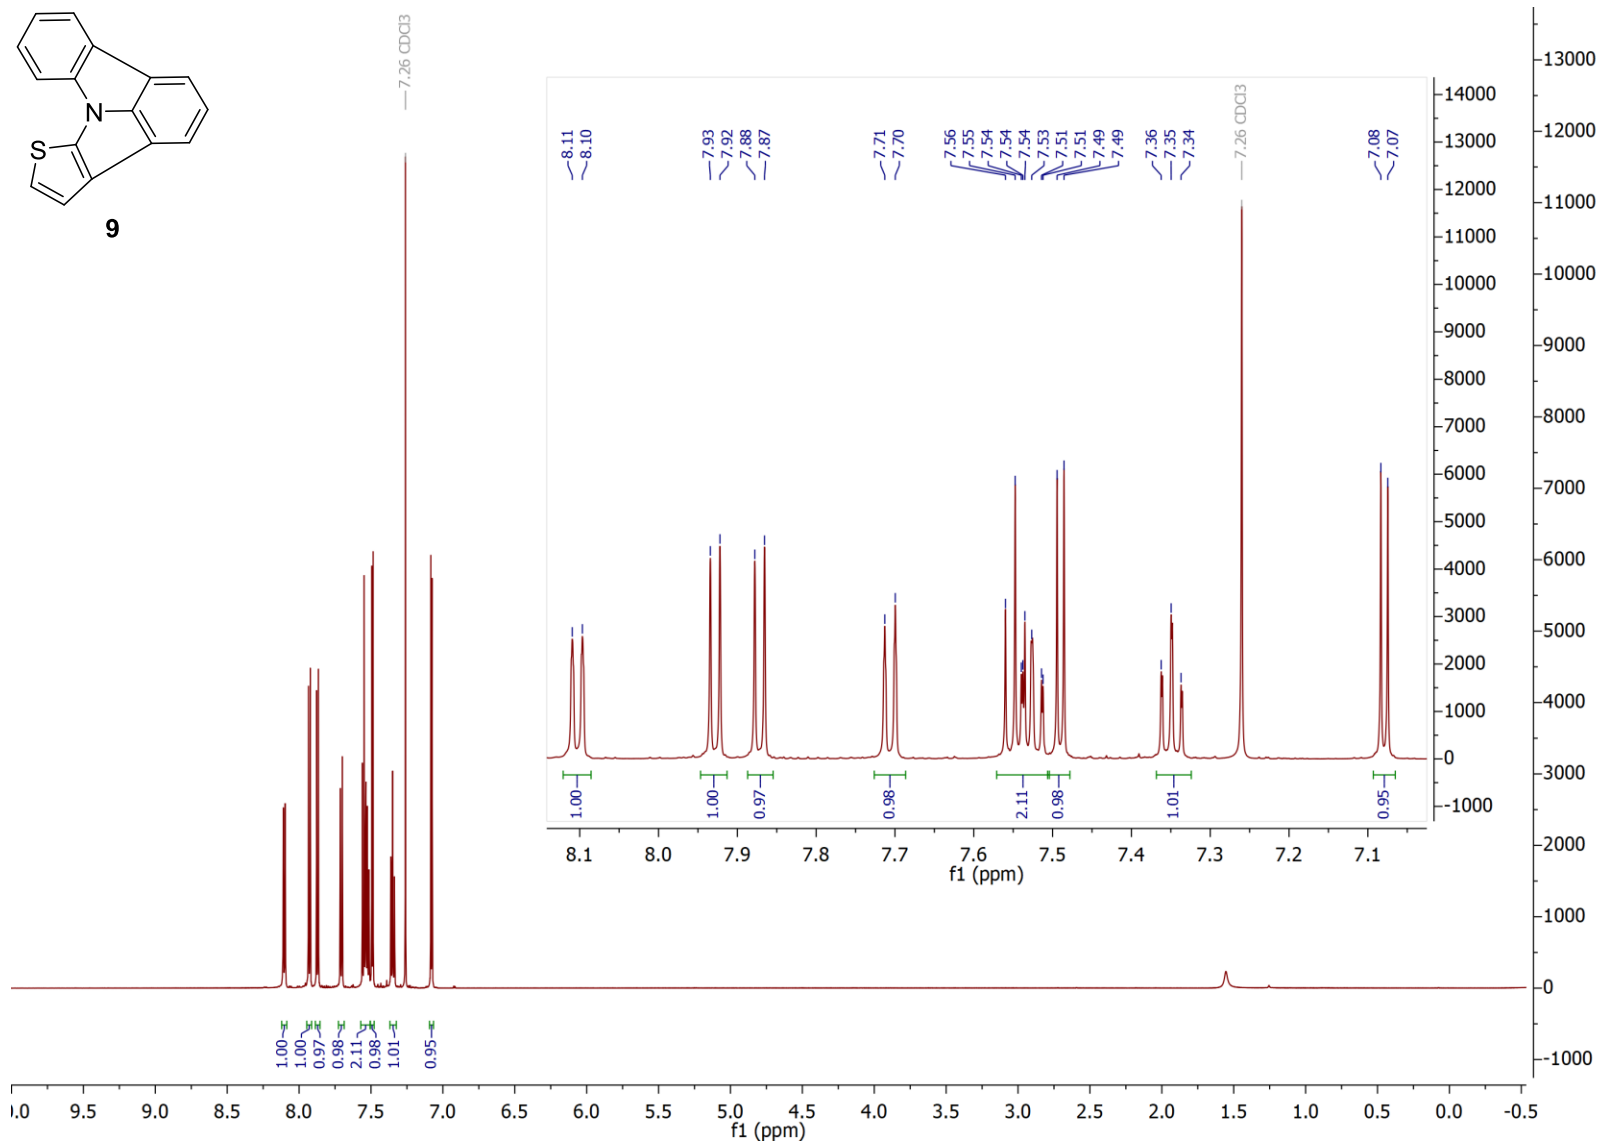

Figure S 13:  $^1\text{H}$  NMR spectrum of **9**

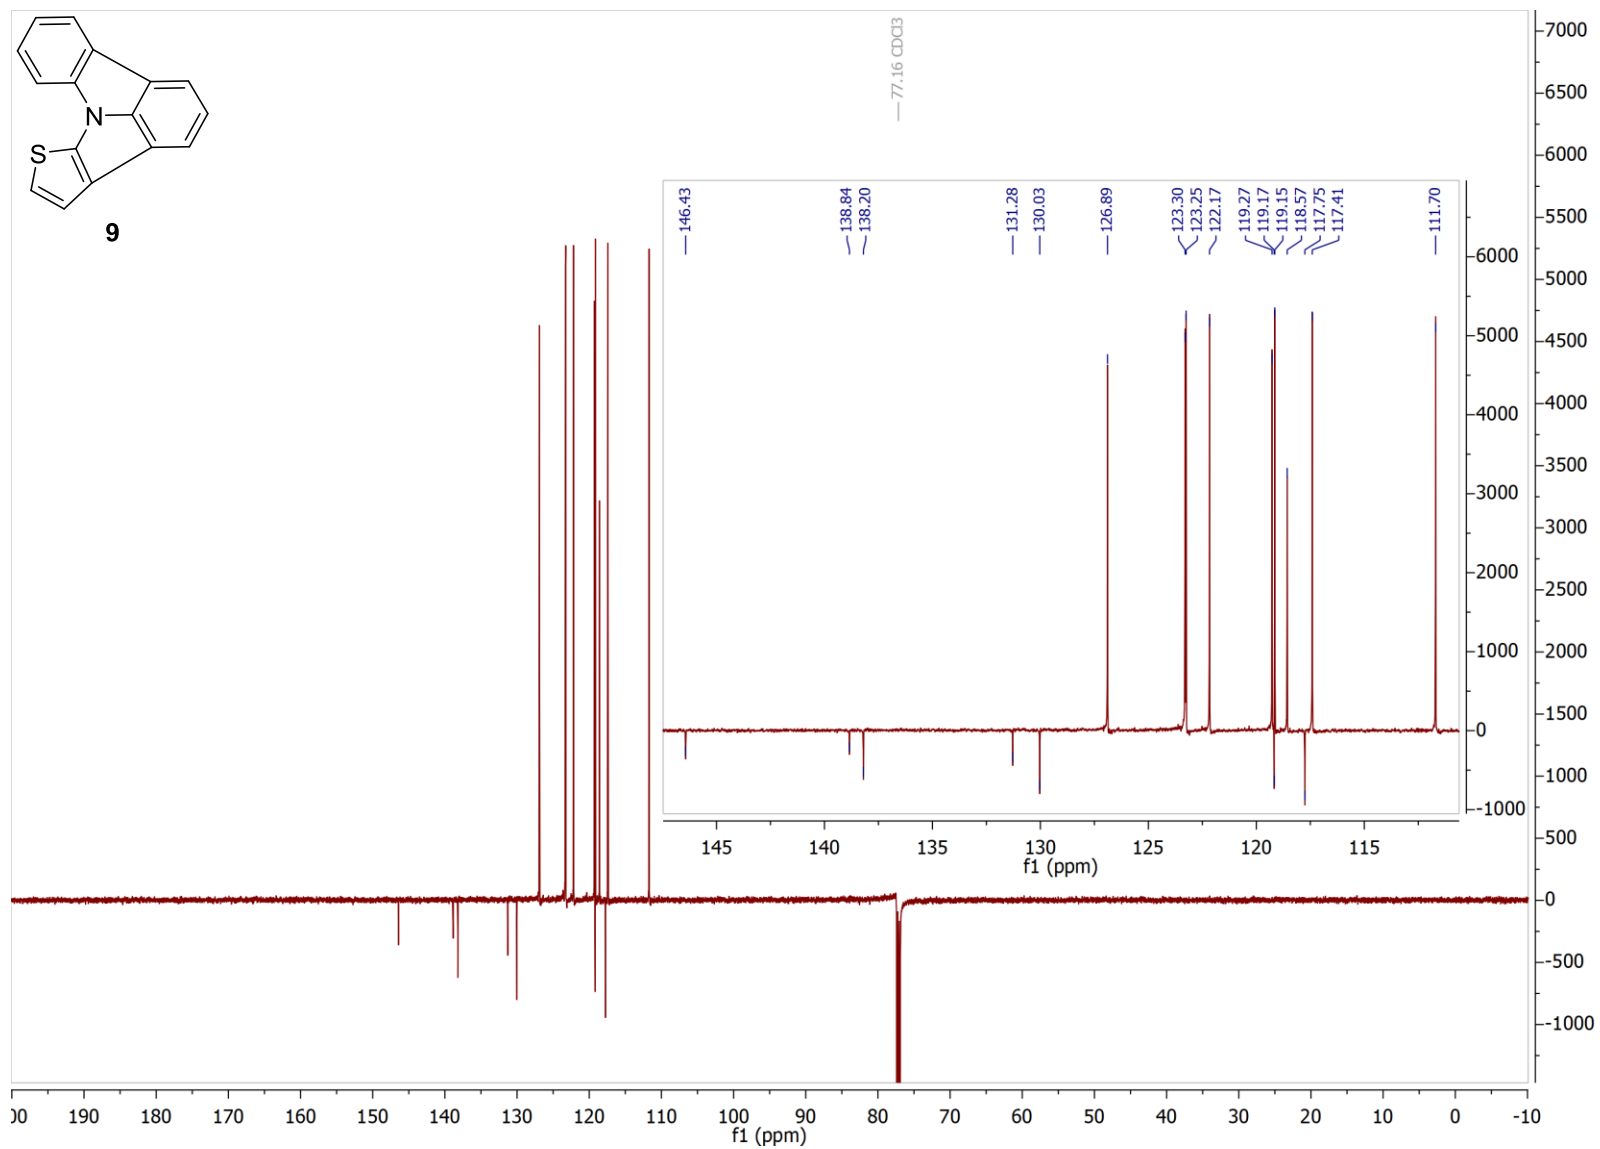

Figure S 14:  $^{13}\text{C}$  NMR spectrum of **9**

## 2. Cyclic Voltammetry

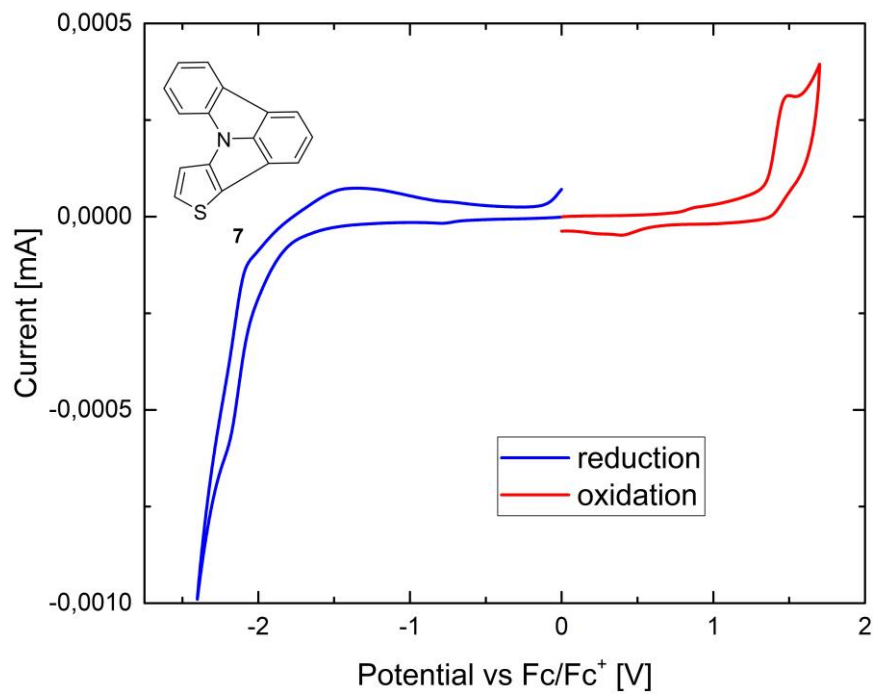

Figure S 15: Cyclovoltamogram of 7

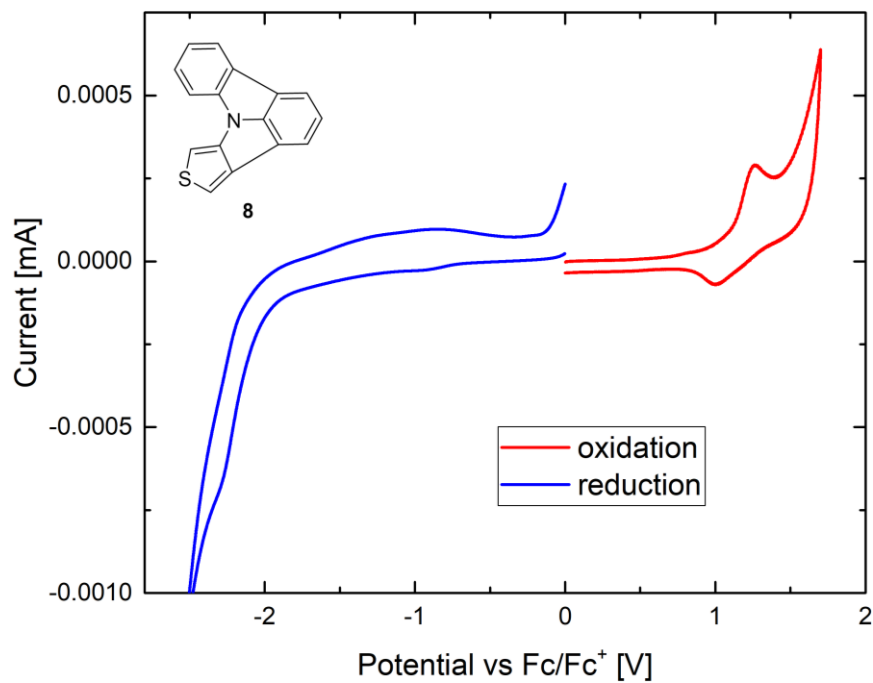

Figure S 16: Cyclovoltamogram of 8



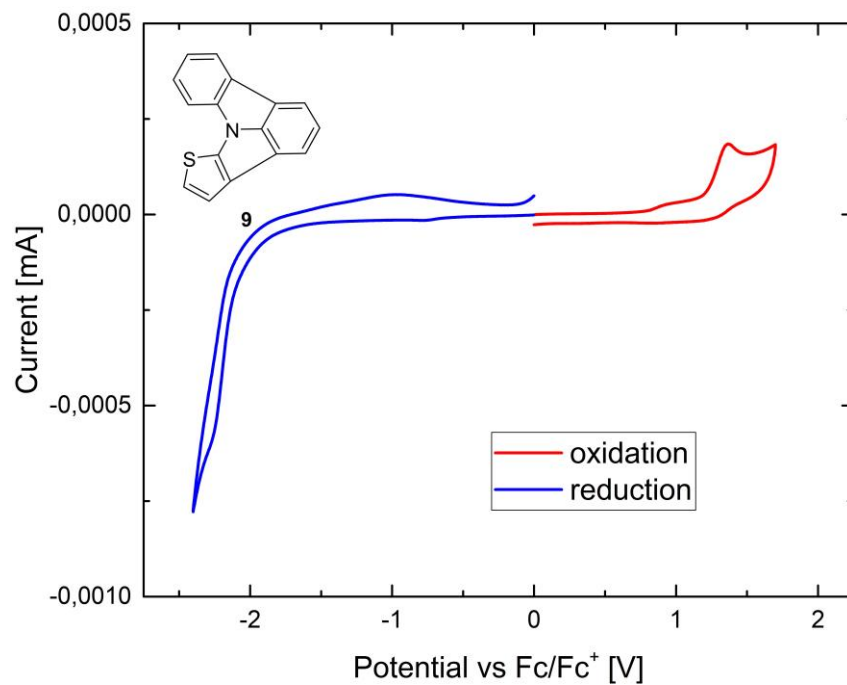

**Figure S 17:** Cyclic voltammogram of **9**

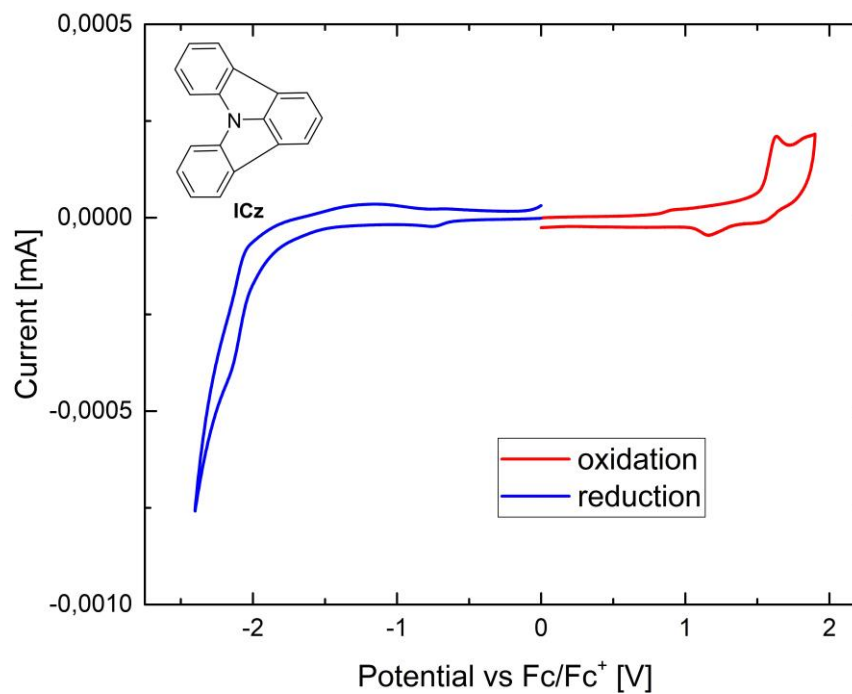

**Figure S 18:** Cyclic voltammogram of **ICz**

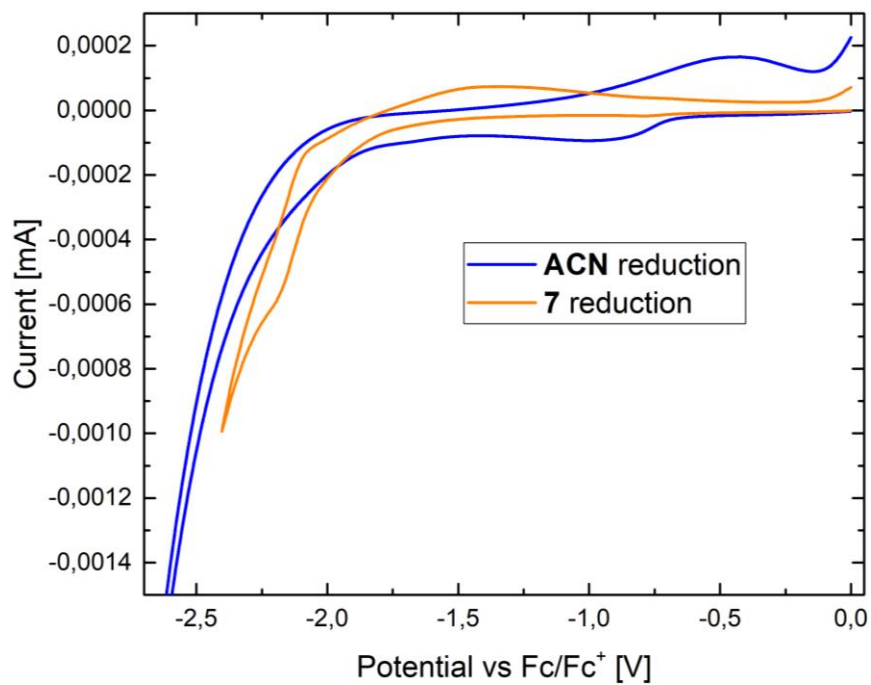

**Figure S 19:** Cyclic voltammogram of ACN reduction compared to **7**

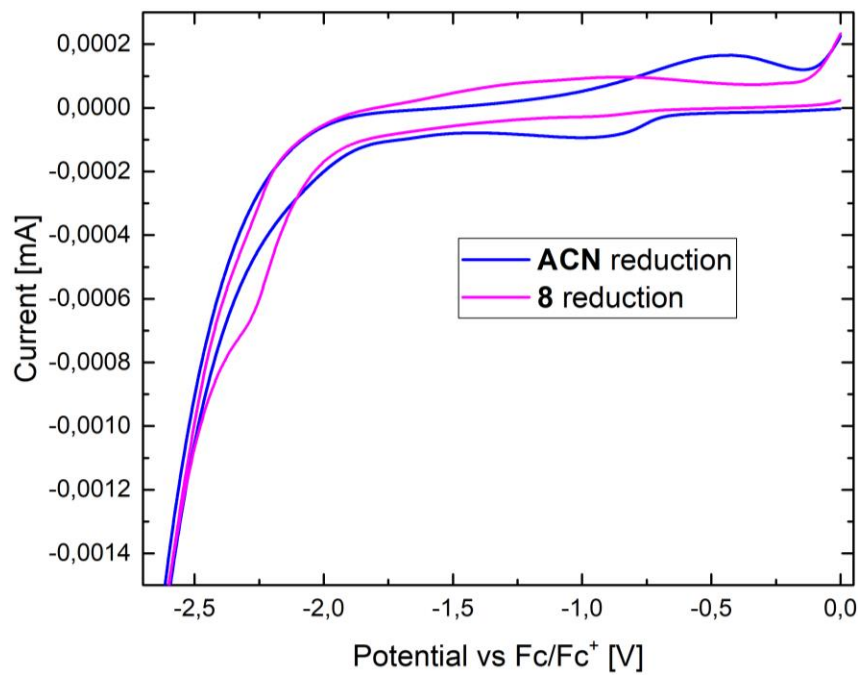

**Figure S 20:** Cyclic voltammogram of ACN reduction compared to **8**

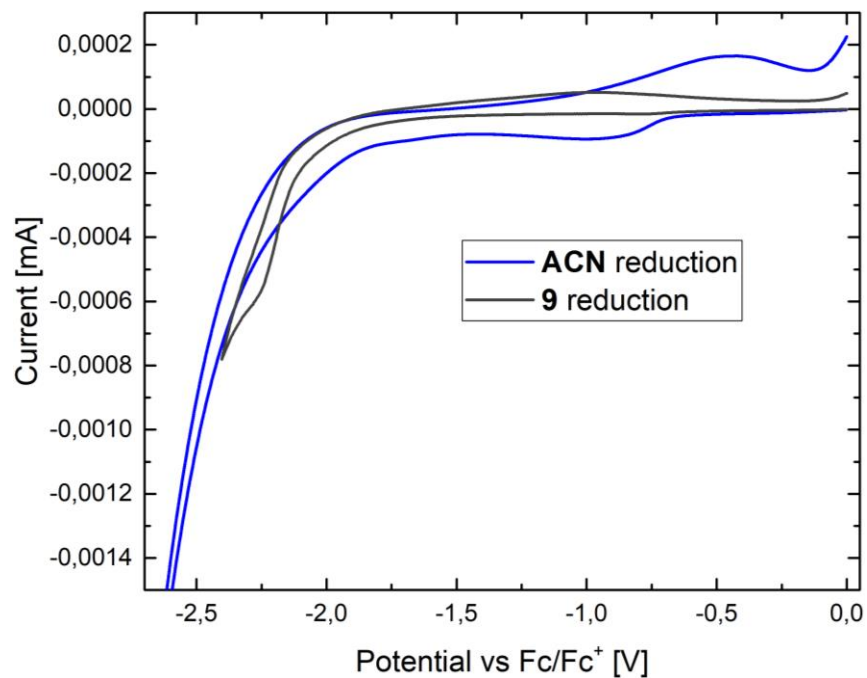

**Figure S 21:** Cyclic voltammogram of ACN reduction compared to **9**

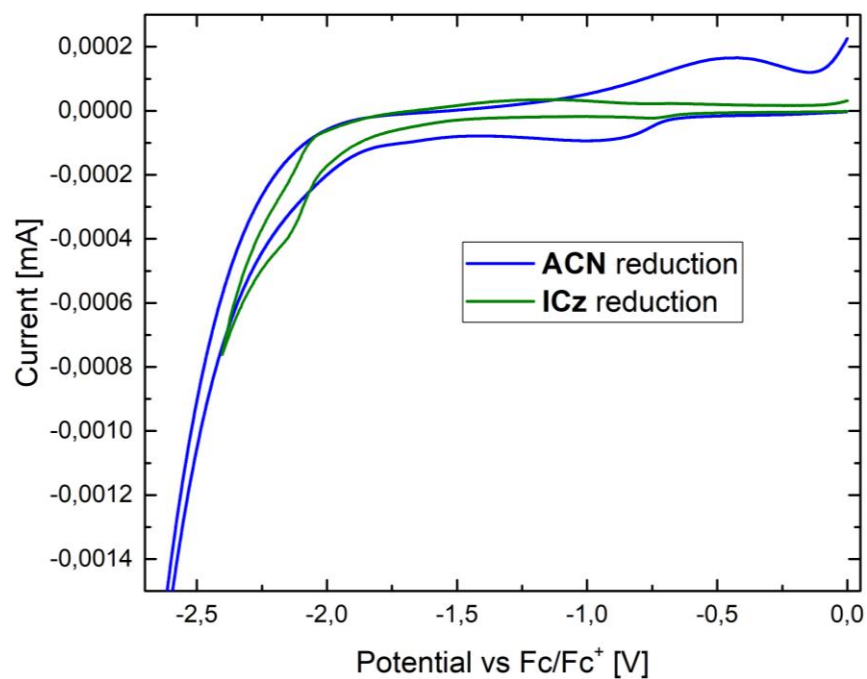

**Figure S 22:** Cyclic voltammogram of ACN reduction compared to **ICz**

### 3. HRMS – Spectra

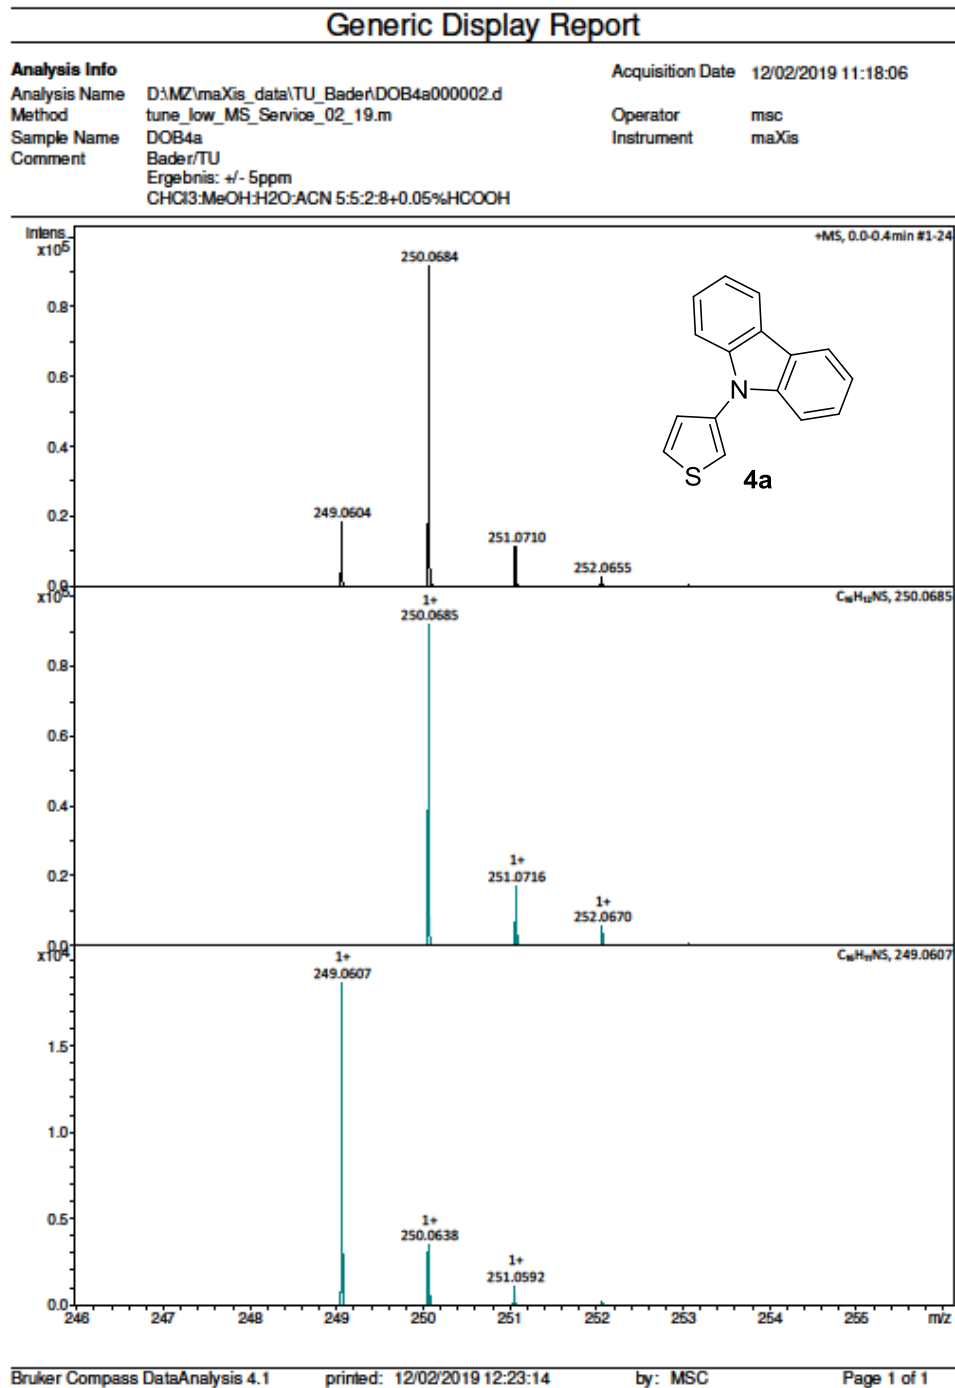

Figure S 23: HRMS spectrum of 4a

# Generic Display Report

## Analysis Info

Analysis Name D:\MZ\maXis\_data\TU\_Bader\DOB4b.d  
Method tune\_low\_MS\_Service\_02\_19.m  
Sample Name DOB4b  
Comment Bader/TU  
Ergebnis: +/- 5ppm  
2-Propanol/ACN/H2O 1:4:1 + 0.1%HCOOH

Acquisition Date 08/02/2019 15:30:50

Operator msc  
Instrument maXis

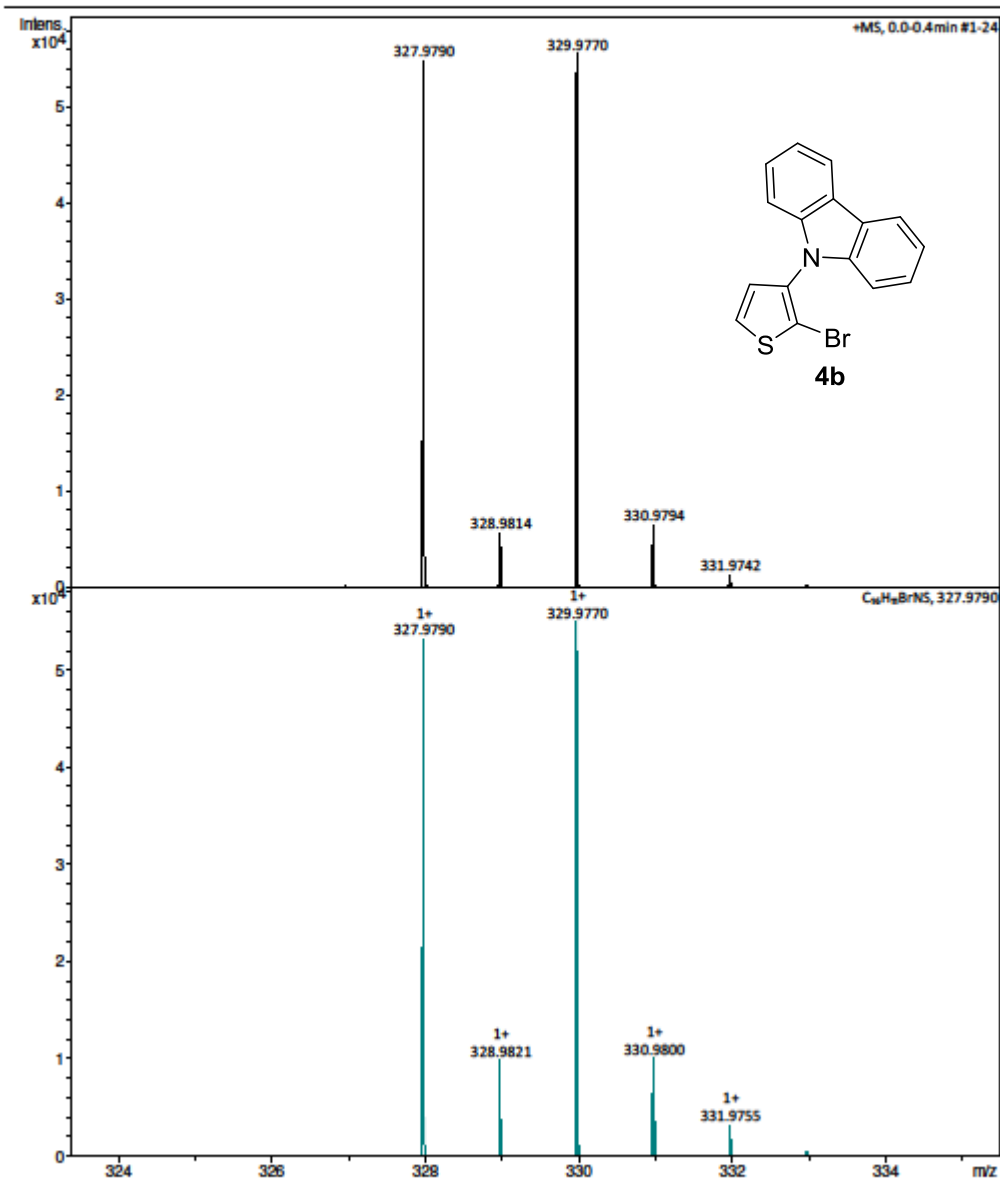

Figure S 24: HRMS spectrum of 4b

# Generic Display Report

## Analysis Info

Analysis Name D:\MZ\maXis\_data\TU\_Bader\DOB5.d  
Method tune\_low\_MS\_Service\_02\_19.m  
Sample Name DOB5  
Comment Bader/TU  
Ergebnis: +/- 5ppm  
2-Propanol/ACN/H2O 1:4:1 + 0.1%HCOOH

Acquisition Date 08/02/2019 15:14:37

Operator msc  
Instrument maXis

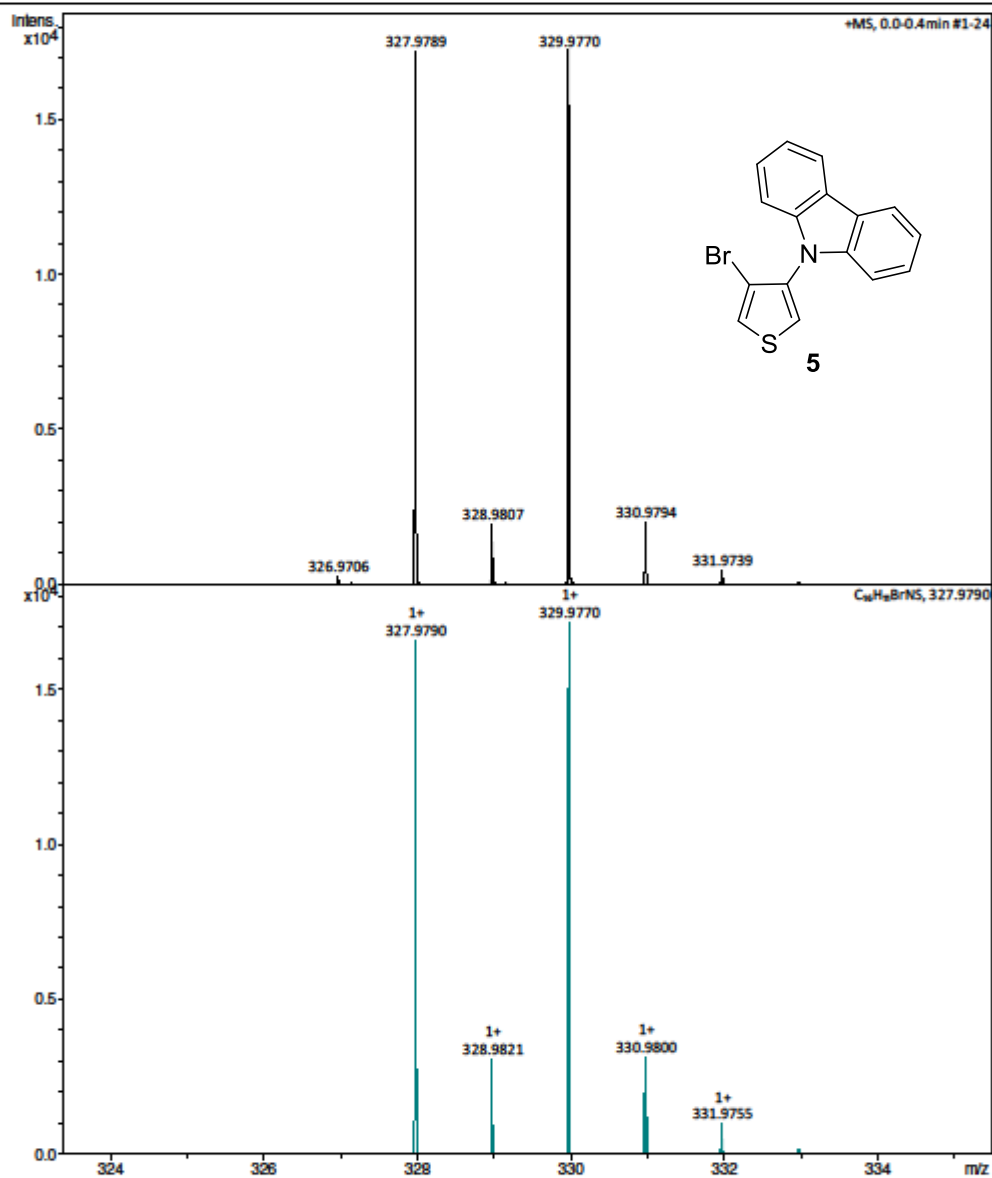

Figure S 25: HRMS spectrum of 5

## Generic Display Report

### Analysis Info

Analysis Name D:\MZ\maXis\_data\TU\_Bader\DOB6.d  
Method tune\_low\_MS\_Service\_02\_19.m  
Sample Name DOB6  
Comment Bader/TU  
Ergebnis: +/- 5ppm  
2-Propanol/ACN/H2O 1:4:1 + 0.1%HCOOH

Acquisition Date 08/02/2019 15:24:09

Operator msc  
Instrument maXis

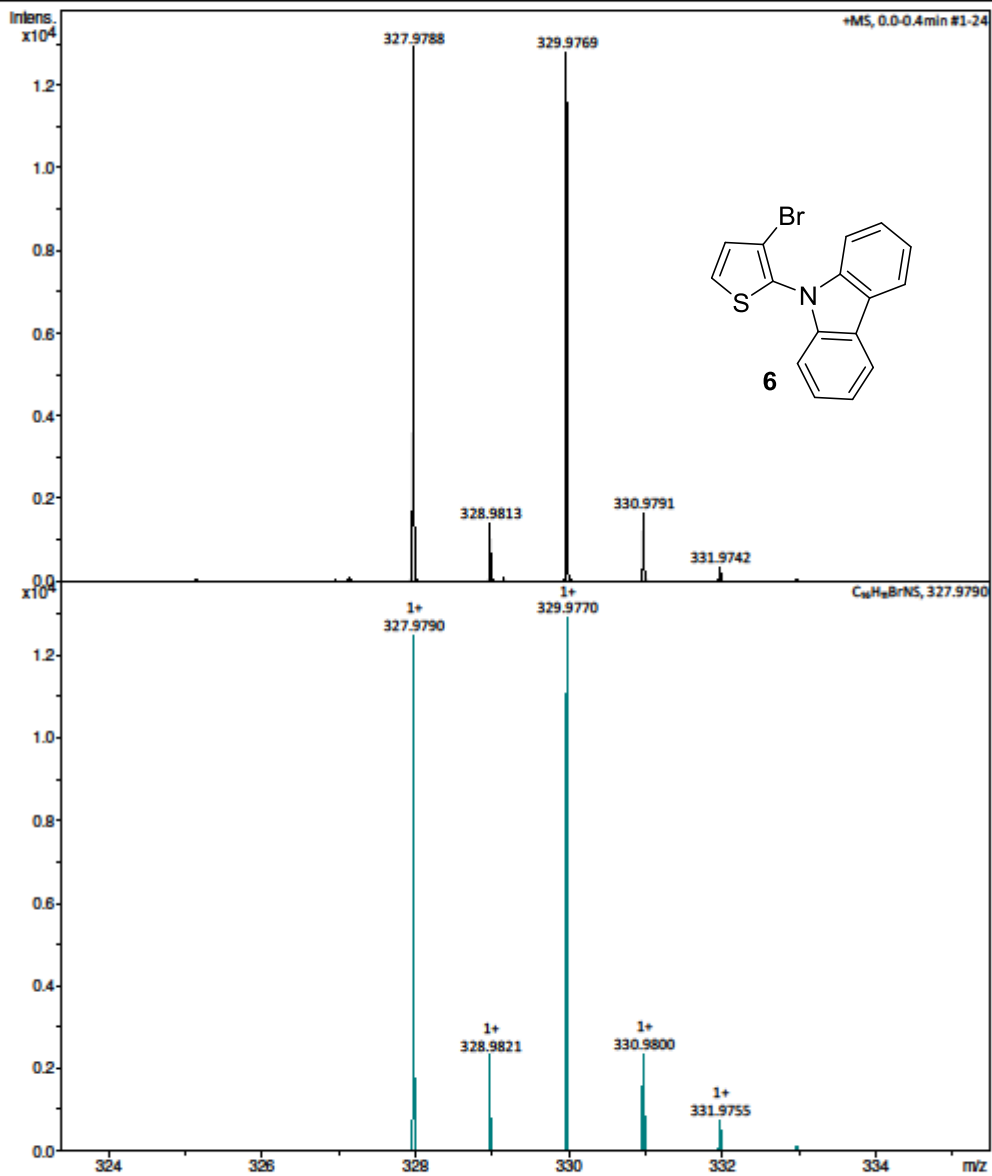

Figure S 26: HRMS spectrum of 6

## Generic Display Report

### Analysis Info

Analysis Name D:\MZ\maXis\_data\TU\_Bader\DOB7.d  
Method tune\_low\_MS\_Service\_02\_19.m  
Sample Name DOB7  
Comment Bader/TU  
Ergebnis: +/- 5ppm  
2-Propanol/ACN/H2O 1:8:2 + 0.1%HCOOH

Acquisition Date 08/02/2019 15:49:17

Operator msc  
Instrument maXis

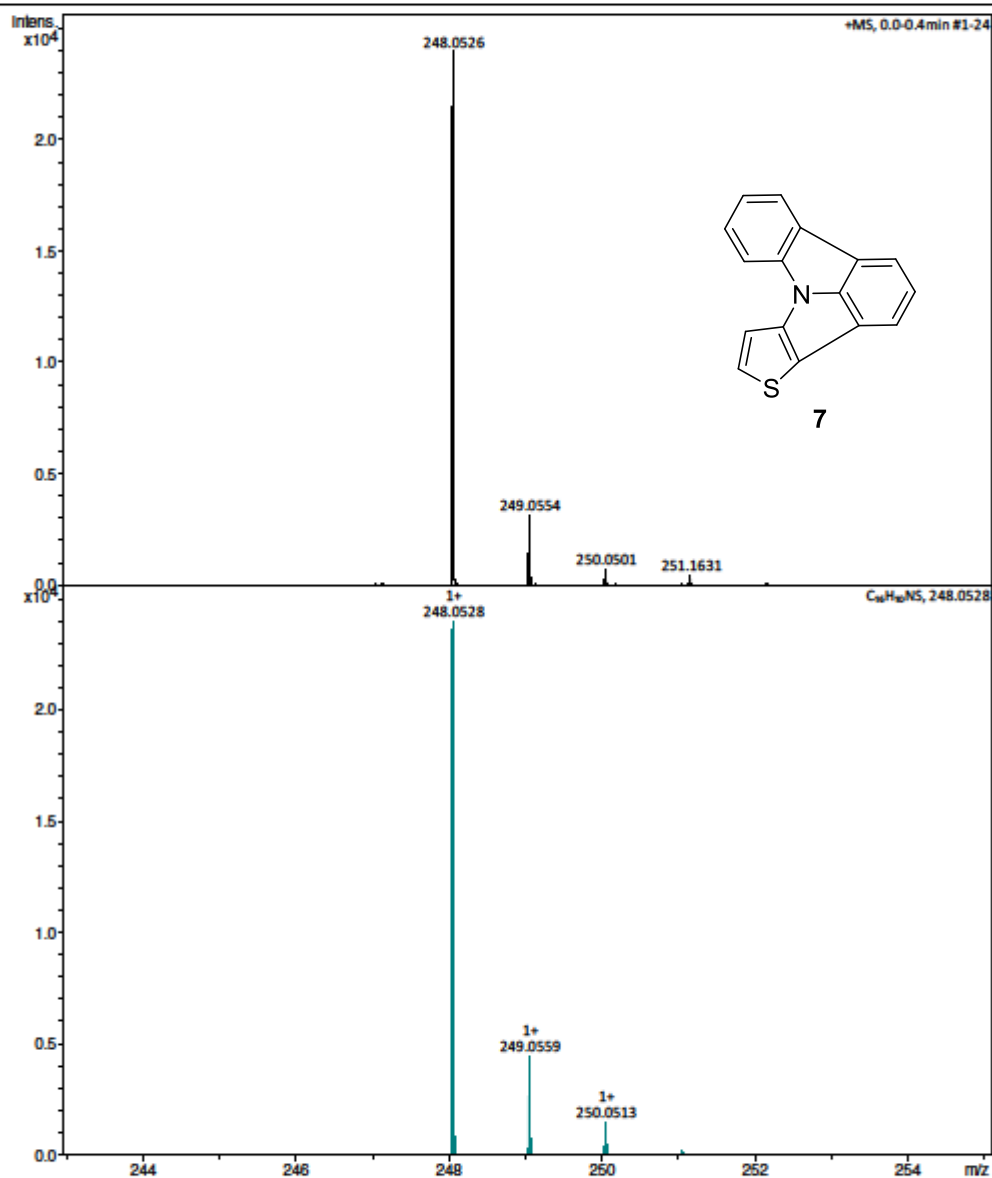

Figure S 27: HRMS spectrum of 7



## Generic Display Report

### Analysis Info

Analysis Name D:\MZ\maXis\_data\TU\_Bader\DOB8.d  
Method tune\_low\_MS\_Service\_02\_19.m  
Sample Name DOB8  
Comment Bader/TU  
Ergebnis: +/- 5ppm  
2-Propanol/ACN/H2O 1:8:2 + 0.1%HCOOH

Acquisition Date 08/02/2019 15:52:22

Operator msc  
Instrument maXis

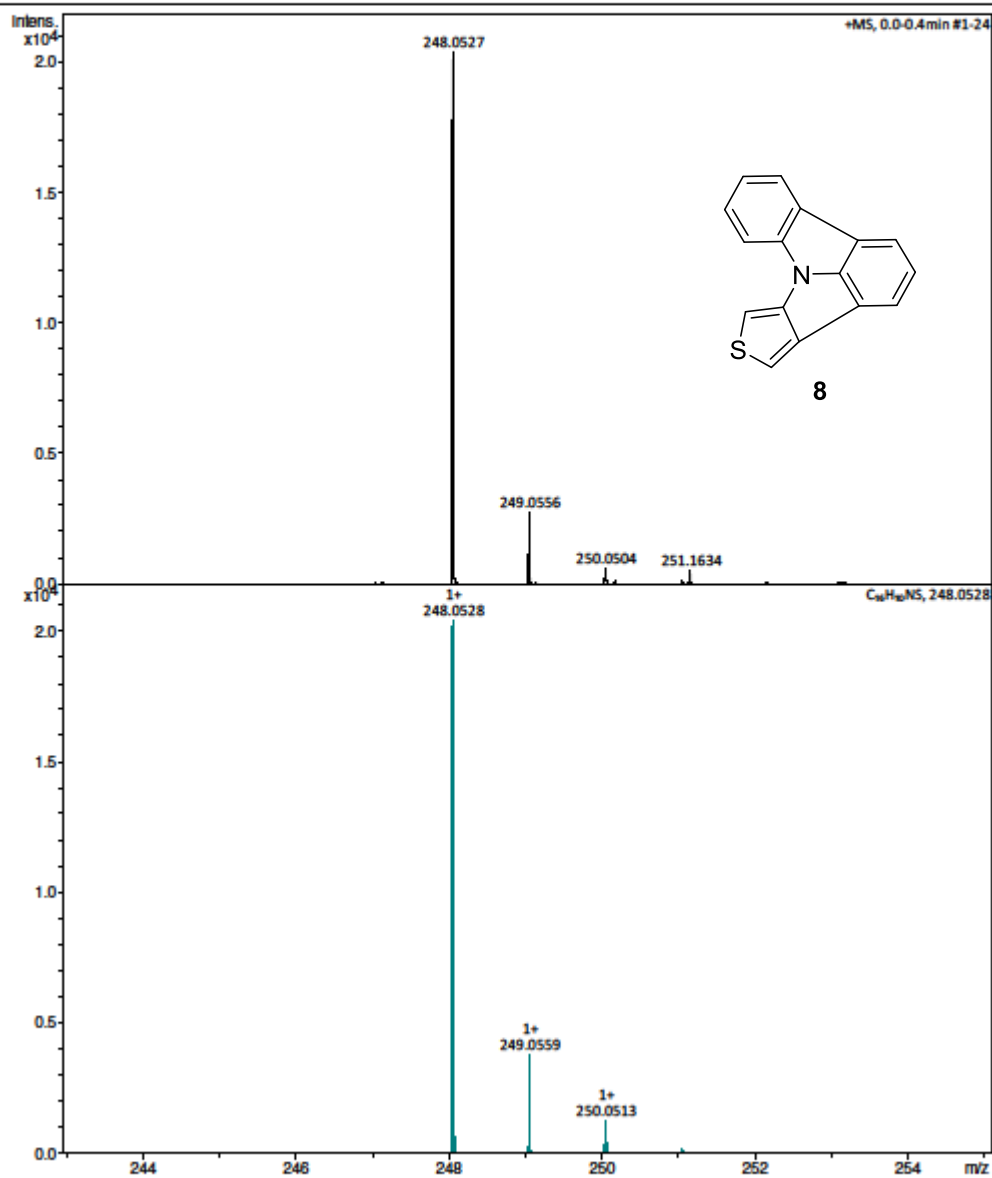

Figure S 28: HRMS spectrum of 8

## Generic Display Report

### Analysis Info

Analysis Name D:\MZ\maXis\_data\TU\_Bader\DOB9.d  
Method tune\_low\_MS\_Service\_02\_19.m  
Sample Name DOB9  
Comment Bader/TU  
Ergebnis: +/- 5ppm  
2-Propanol/ACN/H2O 1:8:2 + 0.1%HOAc

Acquisition Date 08/02/2019 15:59:27

Operator msc  
Instrument maXis

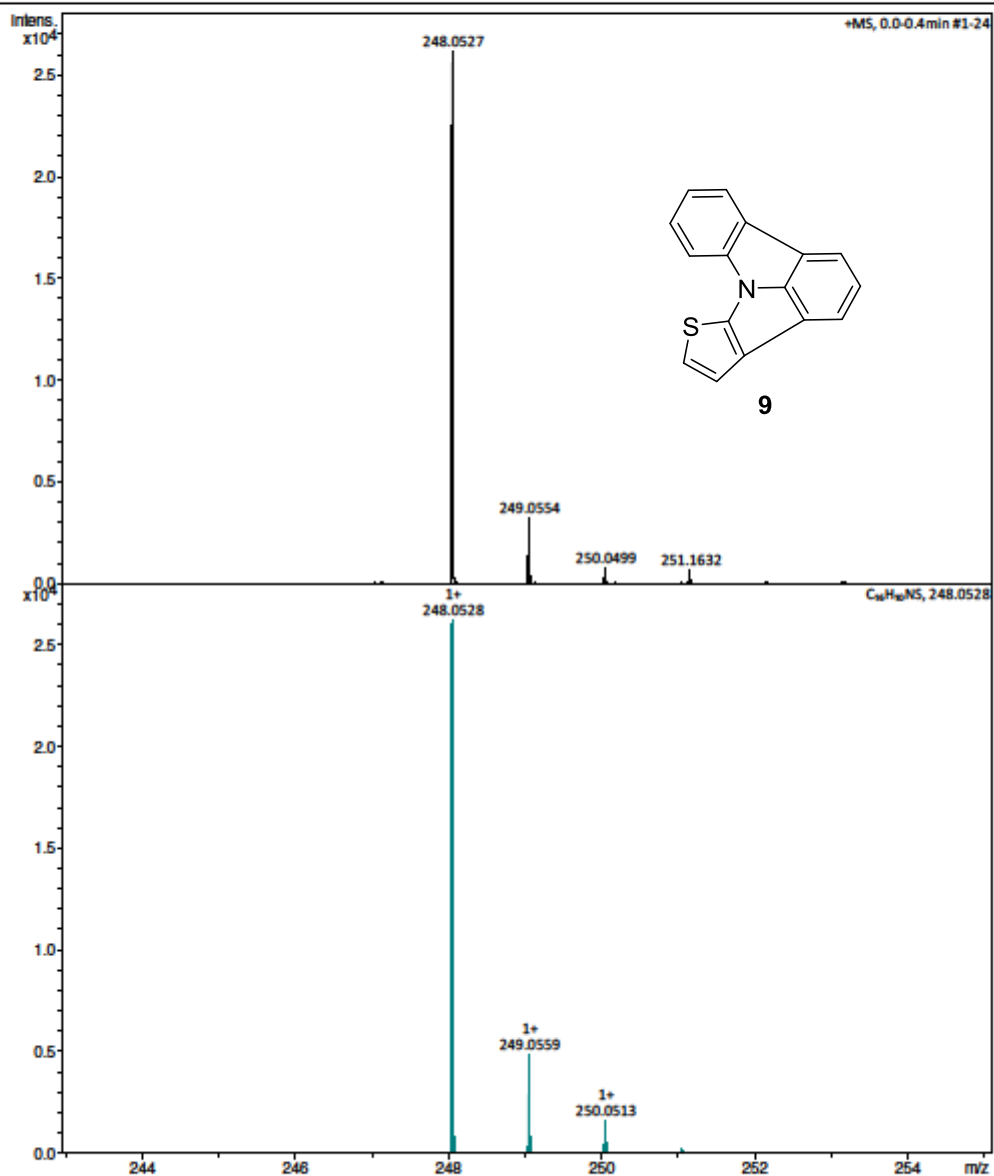

Figure S 29: HRMS spectrum of 9

## 4. Electrochemical and photophysical data

**Table S1. Electrochemical and photophysical data of ICz and the developed thienopyrrolo[3,2,1-*jk*]carbazoles 7-9.**

|     | opt. BG <sup>a,b</sup> | $\lambda_{max}$ <sup>b,c</sup> | $E_T$ <sup>d</sup> | HOMO <sup>e</sup> | LUMO <sup>e</sup> | $\lambda_{max}$ <sup>b,f</sup> | $\epsilon_{max}$ <sup>f,h</sup>          | $\lambda_{low}$ <sup>b,g</sup> | $\epsilon_{low}$ <sup>g,h</sup>          |
|-----|------------------------|--------------------------------|--------------------|-------------------|-------------------|--------------------------------|------------------------------------------|--------------------------------|------------------------------------------|
|     | [eV]                   | [nm]                           | [eV]               | [eV]              | [eV]              | [nm]                           | [L*mol <sup>-1</sup> *cm <sup>-1</sup> ] | [nm]                           | [L*mol <sup>-1</sup> *cm <sup>-1</sup> ] |
| ICz | 3.30                   | 375                            | 2.84               | -5.78             | -2.27             | 285                            | 37720                                    | 363                            | 11100                                    |
| 7   | 3.25                   | 390                            | 2.57               | -5.68             | -2.38             | 280                            | 29500                                    | 347                            | 15140                                    |
| 8   | 3.30                   | 380                            | 2.71               | -5.56             | -2.28             | 284                            | 27760                                    | 369                            | 5880                                     |
| 9   | 3.22                   | 410                            | 2.79               | -5.53             | -2.30             | 283                            | 42900                                    | 345                            | 4720                                     |

<sup>a</sup> HOMO-LUMO energy gaps, determined from the absorption onset. <sup>b</sup> measured in DCM solutions (5  $\mu$ M) at room temperature; <sup>c</sup> emission maximum; <sup>d</sup> determined from the highest vibronic transition in solid solutions of toluene/iPrOH (10:1; 1 mg/ml) at 77 K; <sup>e</sup> calculated from the onset of the oxidation and reduction peak observed during cyclic voltammetry relative to ferrocene/ferrocene<sup>+</sup> (4.8 eV); <sup>f</sup> absorption maximum (only peaks > 270 nm considered due to possible solvent interference); <sup>g</sup> lowest energy absorption peak; <sup>h</sup> molar attenuation coefficient, calculated from absorption.
